# Supplementary material for: Proximity to Photosystem II is necessary for activation of Plastid Terminal Oxidase (PTOX) for photoprotection
Source: PubMed Central journal article supplement (PMC10767095; doi:10.1038/s41467-023-44454-x), 2024-01-04
Supplement: 41467_2023_44454_MOESM1_ESM.pdf [file 41467_2023_44454_MOESM1_ESM.pdf]

## Supporting Information for

### Proximity to Photosystem II is necessary for activation of Plastid Terminal Oxidase (PTOX) for photoprotection.

Pablo Ignacio Calzadilla<sup>1</sup>, Junliang Song<sup>1</sup>, Patrick Gallois<sup>2</sup> and Giles Nicholas Johnson<sup>1\*</sup>

<sup>1</sup>Department of Earth and Environmental Sciences, Faculty of Science and Engineering, University of Manchester, Manchester, United Kingdom. <sup>2</sup>Faculty of Biology, Medicine and Health, University of Manchester, Manchester, United Kingdom.

\*Prof. Giles Nicholas Johnson.

**Email: [giles.johnson@manchester.ac.uk](mailto:giles.johnson@manchester.ac.uk)**

#### **This file includes:**

Figures S1 to S21  
Supplementary Tables 1 and 2  
SI References

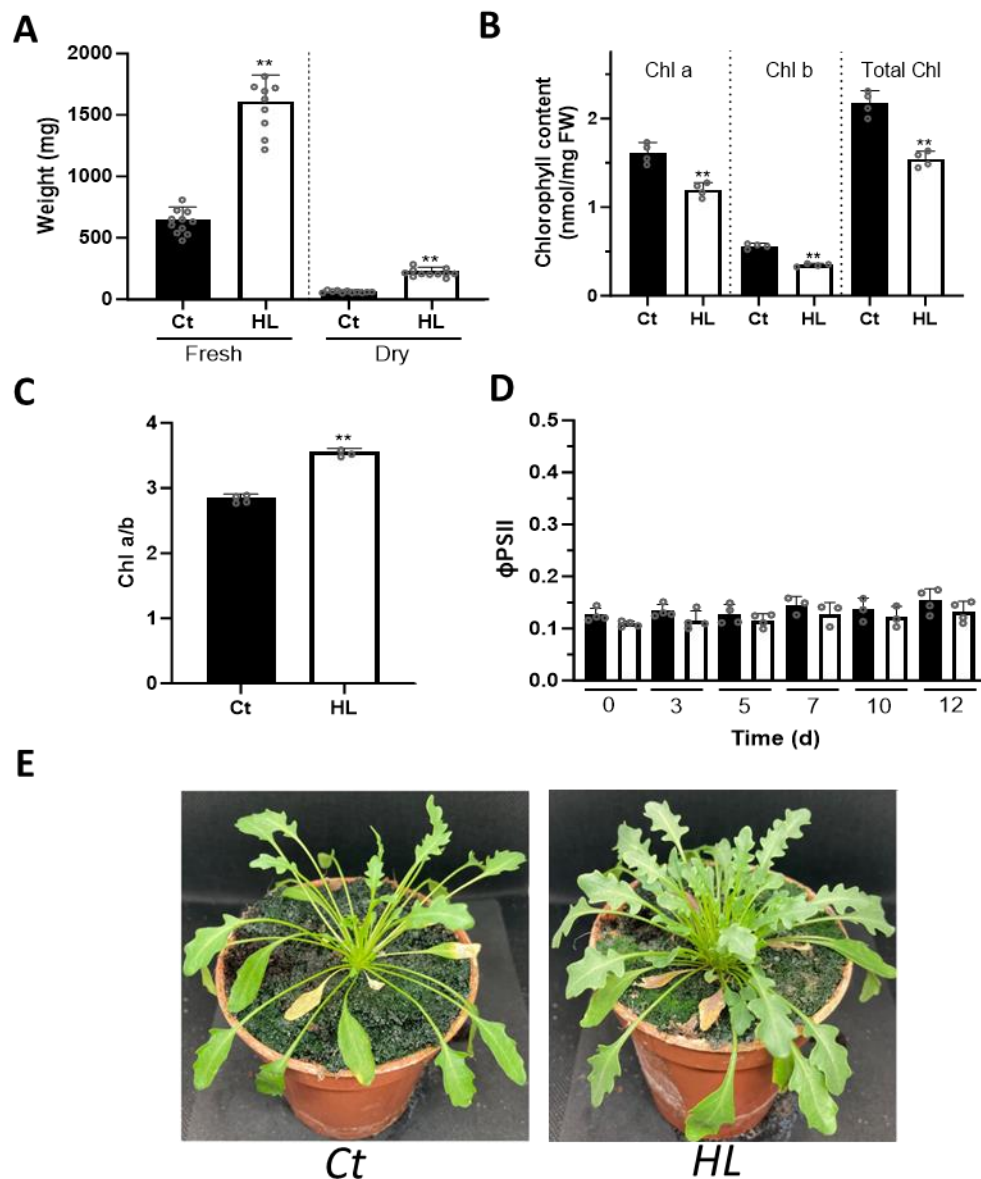

**Figure S1. Characterization of high light acclimation in *Eutrema salsugineum* plants.** **A.** Fresh and dry weight (mg,  $n =$  at least 9), and chlorophyll content ( $\text{mmol} \cdot \text{mg}^{-1}$  FW,  $n = 4$ ) of *Eutrema* plants subjected to control (Ct) or high light (HL) treatments for 10 d (**A** and **B**, respectively). **C.** Chlorophyll a/b ratio of *Eutrema* plants subjected to Ct and HL treatments for 10 d ( $n = 4$ ). **D.** Quantum yield of PSII ( $\Phi_{\text{PSII}}$ ) measured at 21% or 1% O<sub>2</sub> (black and white bars, respectively), during the Ct treatment ( $n =$  at least 3). **E.** Representative images of *Eutrema* plants at the end of the experiment. Data are the mean  $\pm$  SD of independent biological replicates. The asterisk indicates differences between treatments (Student's test,  $p < 0.01$ , two-sided). All raw data, with number of replicates per data point, are provided in the source data file.

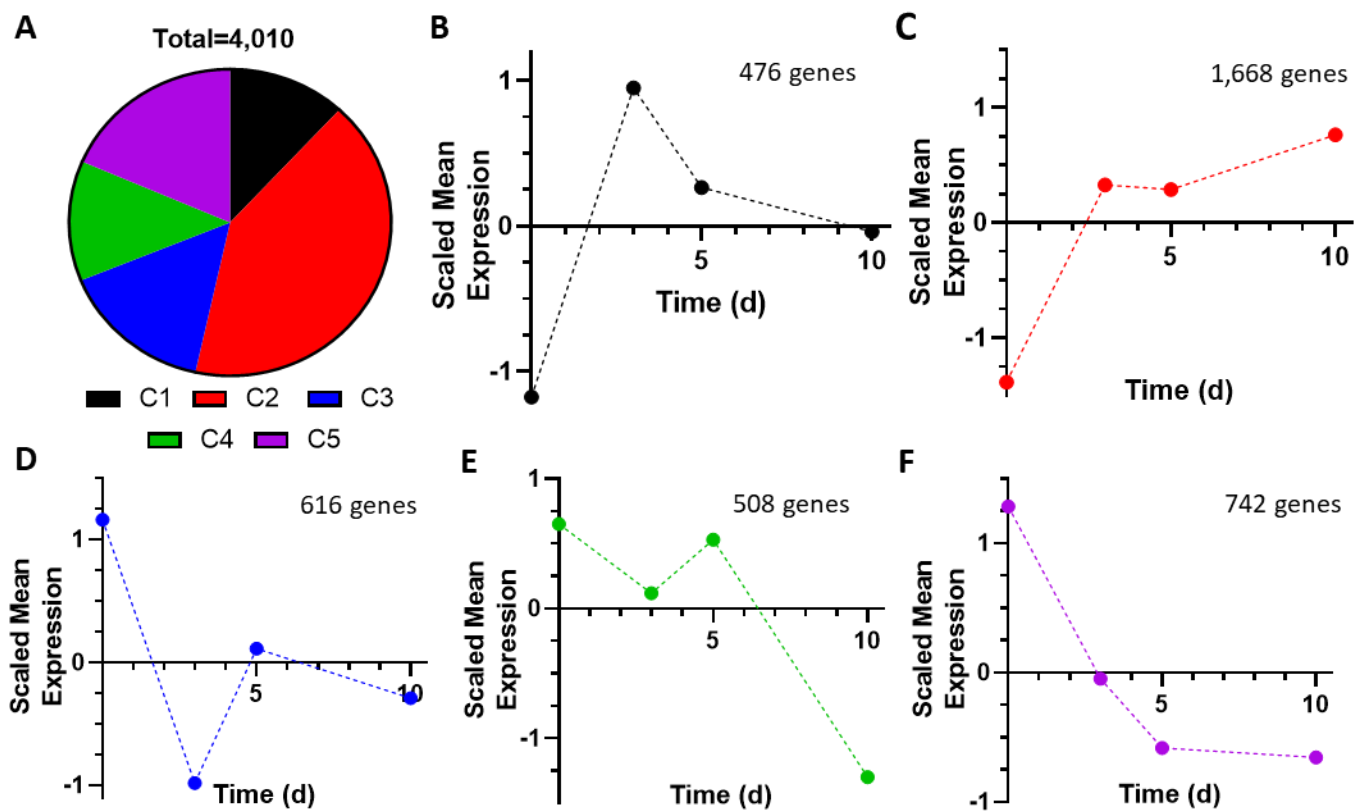

**Figure S2. Gene expression profiles of the different clusters identified in the RNAseq analysis.** A. A total of 4,010 differentially expressed genes were clustered in 5 different groups, each of them with a particular expression profile along the high light treatment. B. Expression profile of Cluster 1 (476 genes); C. Expression profile of Cluster 2 (1,668 genes); D. Expression profile of Cluster 3 (616 genes); E. Expression profile of Cluster 4 (508 genes); F. Expression profile of Cluster 5 (742 genes).

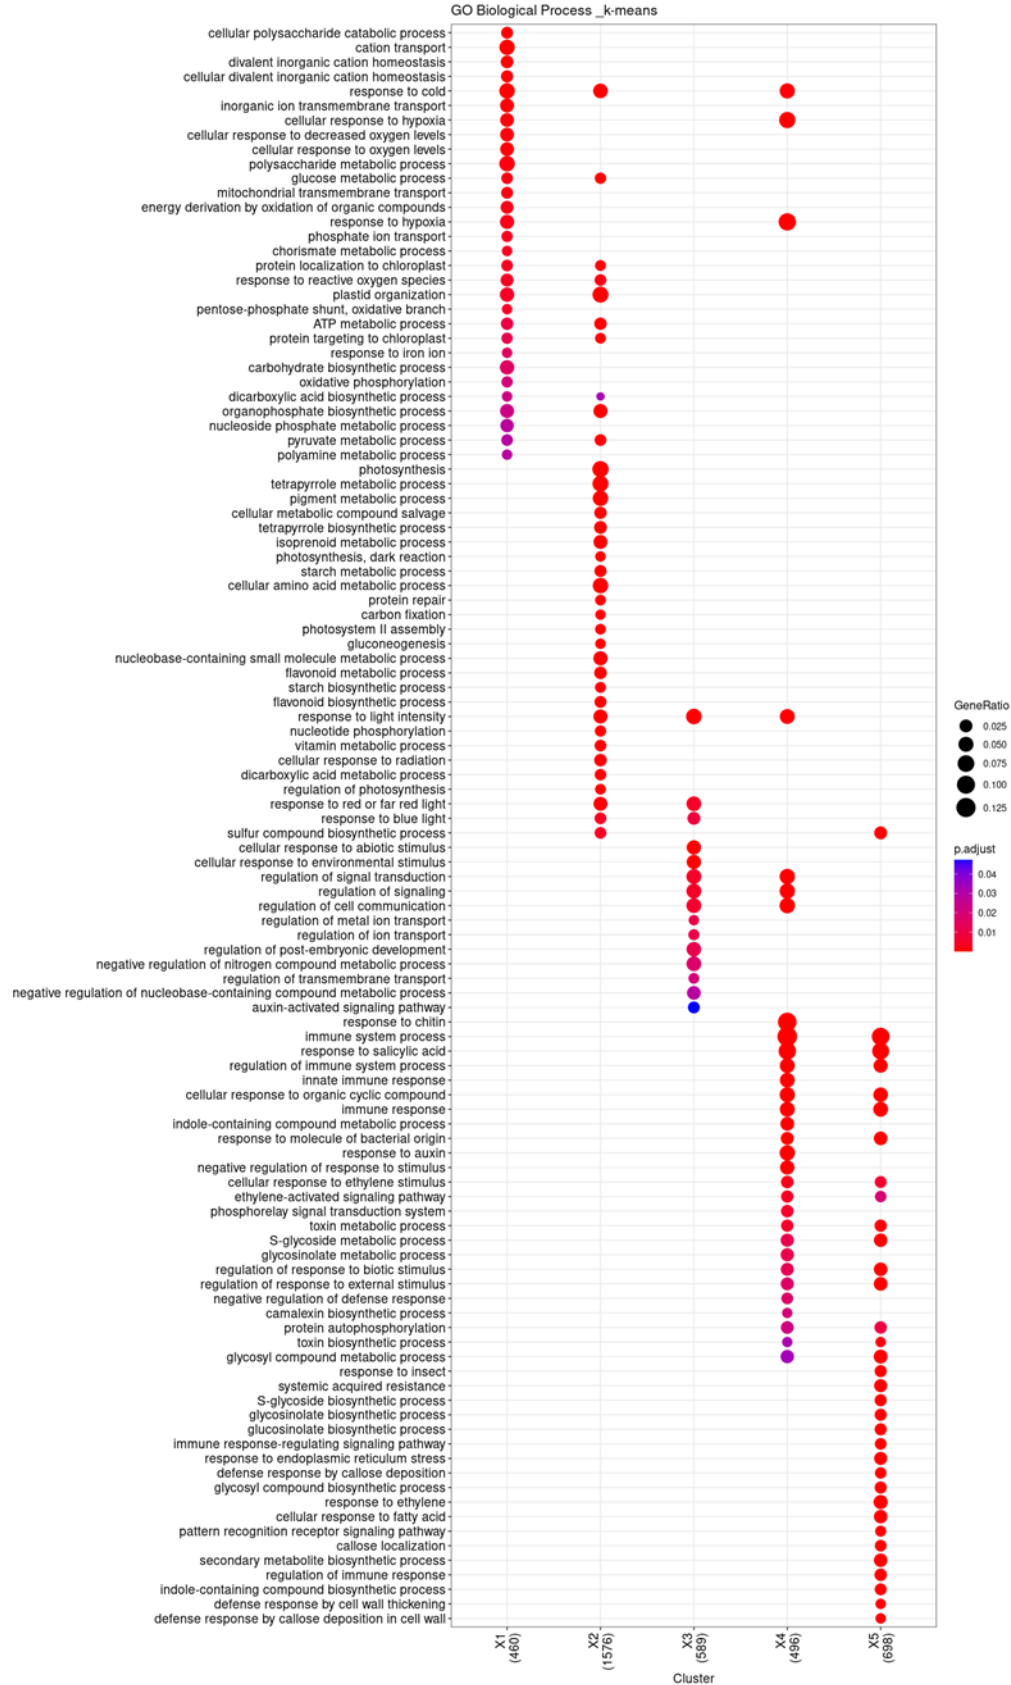

**Figure S3. GO enrichment analysis of the clustered genes in the ‘Biological Process’ category.** In brackets, the number of genes identified in this category for each cluster. Clusters 1 and 2 were mainly enriched in terms related to *photosynthesis*, *plastid organization* and *ROS responses*; while Clusters 3 to 5 to *hormone responses* and *signalling regulation*.

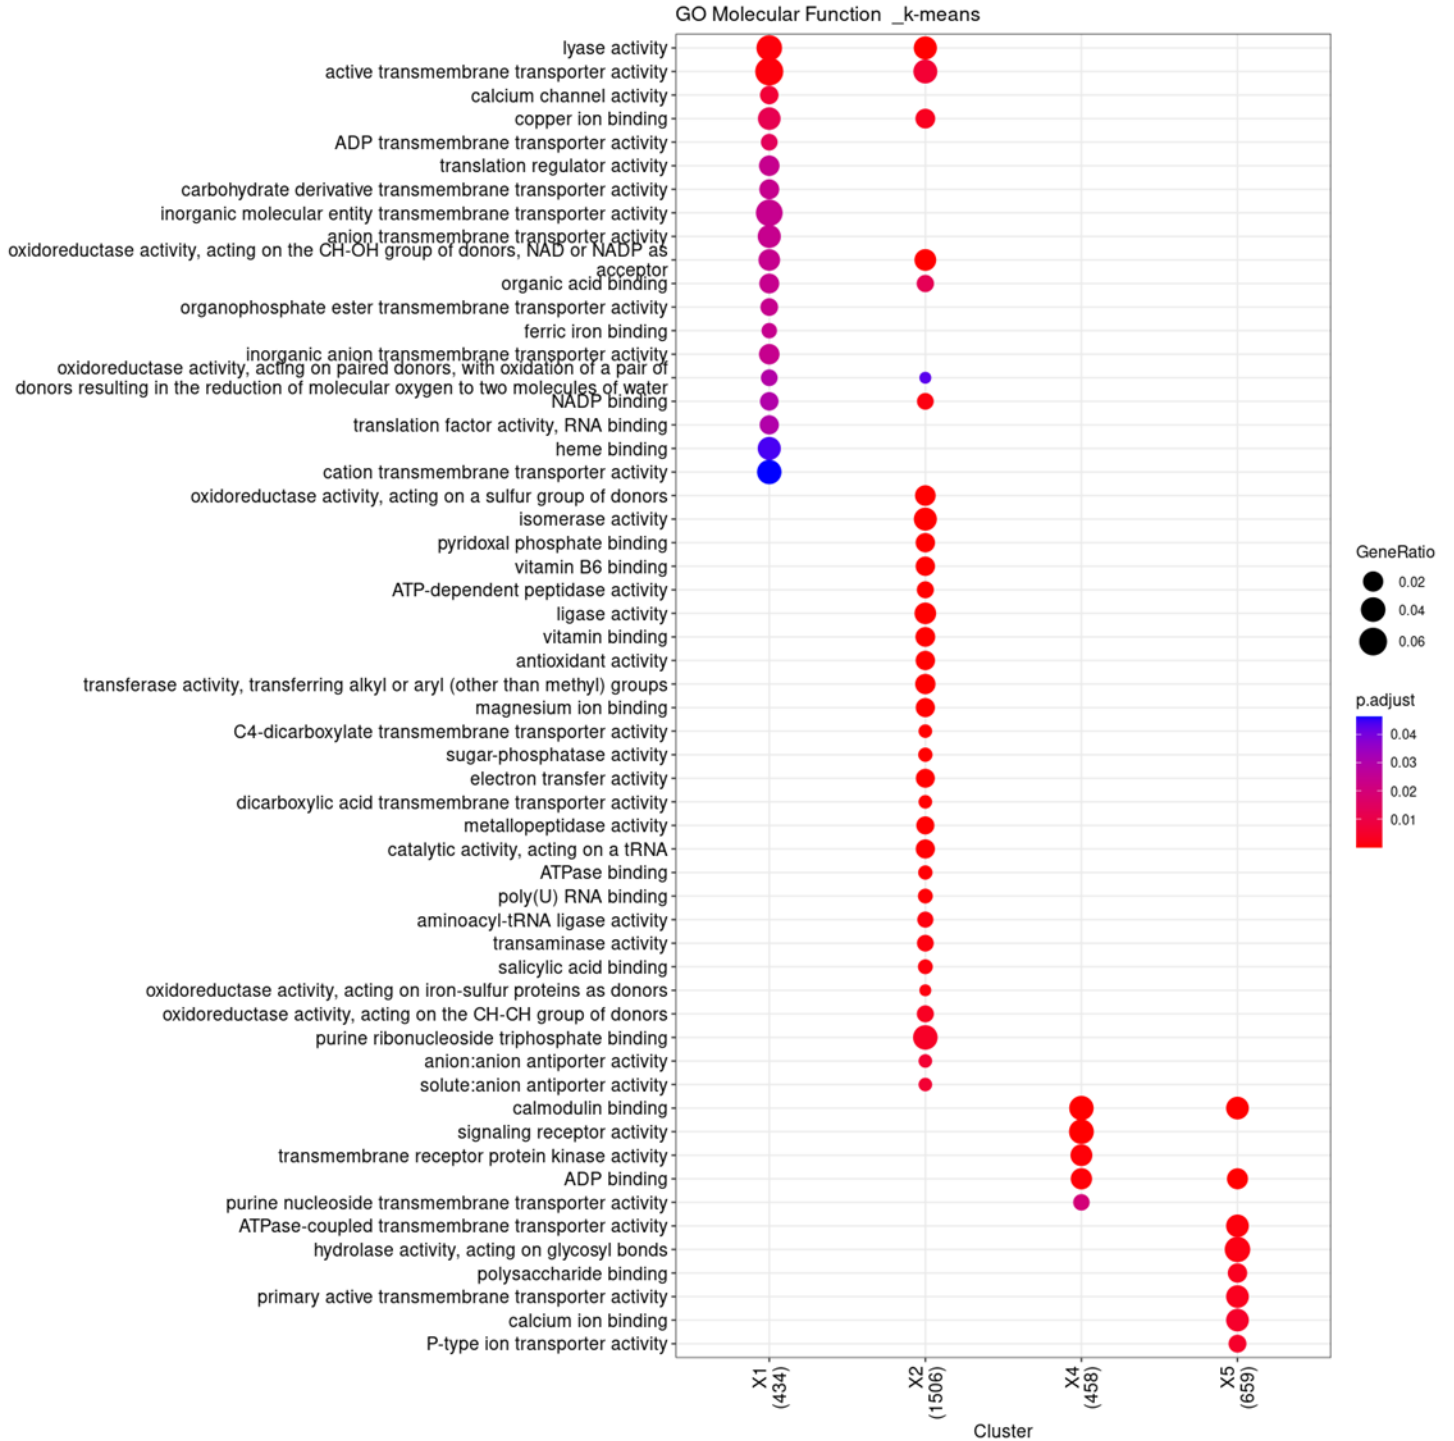

**Figure S4. GO enrichment analysis of the clustered genes in the ‘Molecular function’ category.** In brackets, the number of genes identified in this category for each cluster. Cluster 1 and 2 were enriched in several *oxidoreductase activity* and *transmembrane transporter activity* terms; while Cluster 4 and 5 in the latter and in *signalling translation* terms. No significant GO enrichment was observed for Cluster 3.

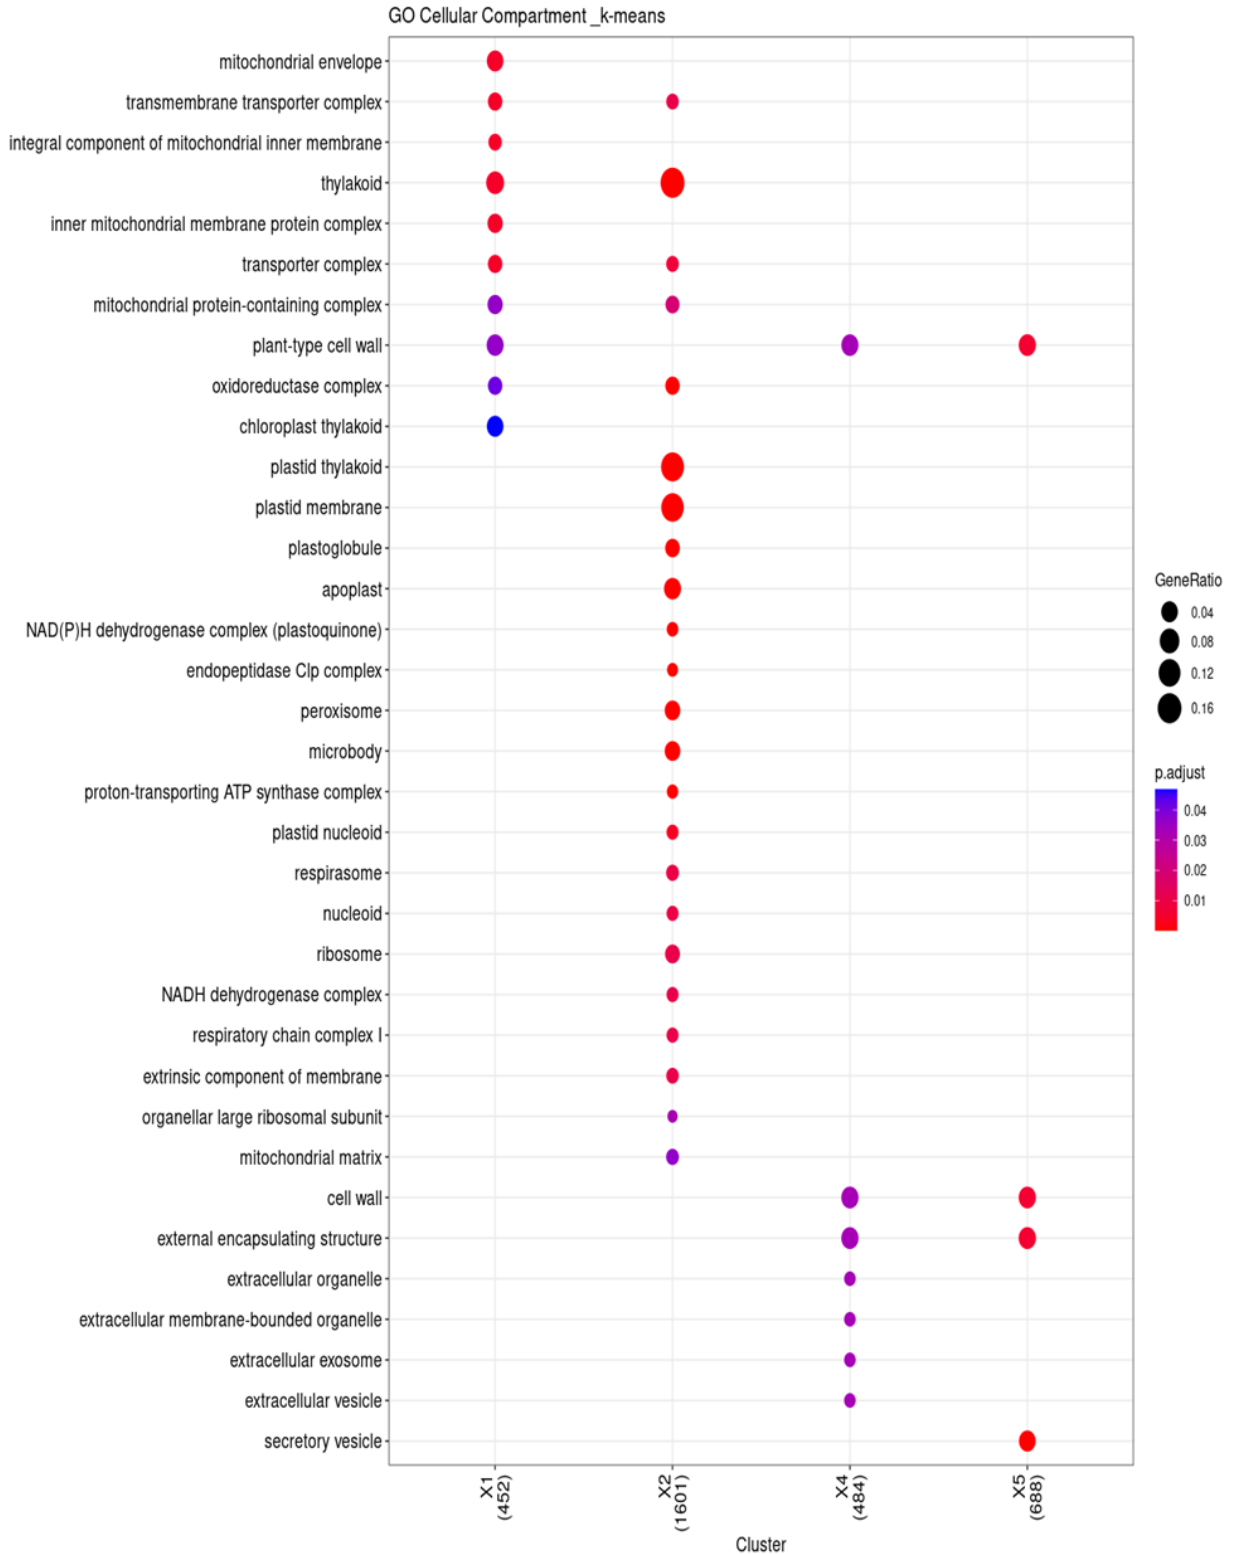

**Figure S5. GO enrichment analysis of the clustered genes in the ‘Cellular compartment’ category.** In brackets, the number of genes identified in this category for each cluster. Cluster 1 and 2 were enriched in *mitochondria* and *chloroplast thylakoids* related terms, being Cluster 2 more associated with the latest. By contrast, Cluster 4 and 5 were associated with *cell wall* and *extracellular components*. Cluster 3 shows no significant GO enrichment for the ‘Cellular Compartment’ group.

|                         | Likelihood         |                    |                 |
|-------------------------|--------------------|--------------------|-----------------|
|                         | Predictor software | Chloroplast stroma | Thylakoid lumen |
| <b>Eutrema PTOX</b>     | TargetP -2.0       | 0.96               | 0.0027          |
|                         | PredSL             | 0.90               | -----           |
| <b>Arabidopsis PTOX</b> | TargetP -2.0       | 0.95               | 0.011           |
|                         | PredSL             | 0.98               | -----           |
| <b>OEC16</b>            | TargetP -2.0       | 0.15               | 0.85            |
|                         | PredSL             | -----              | 0.99            |
| <b>Plastocyanin</b>     | TargetP -2.0       | 0.15               | 0.85            |
|                         | PredSL             | -----              | 0.99            |

#### Eutrema PTOX

>XP\_006413676.1:6-346 ubiquinol oxidase 4, chloroplastic/chromoplastic [Eutrema salsugineum]

MAATVAISGISPRPLIALRRSRAAVSYSTSHRLLHRLPLSSRLLFRNIHRVQATILQDDEEKVVVEESFKAETFPKVPLEEPNMSSSTSALAEAWIIKLEQGVNVFLTDSVIKILDTLYRDRTP  
RFFVLETIARVPYFAMSVLHMYETFGWWRRADYLVHFAESWNEMHLLIMEELGGNSWWFDRFLAQHIATFYFMTVFLYIISPRMAYHFSECVESHAYETYDKFLKASGEELKNSP  
APDIAVKYYTGSDDLFLDFEQATARAPNTRRPTIENLYDVFNIRDDAEHCKTMRACQTLGSLRSPHSILEDDDCNEESGCVVPEAHCEGIVDCIKKSITN

#### Arabidopsis PTOX

>AT4G22260 IM Alternative oxidase family protein [Arabidopsis thaliana(thale cress)]

MAAISGISSGTLTISRPLVTLRRSRAAVSYSSSHRLLHLLPLSSRLLLRNNHRVQATILQDDEEKVVVEESFKAETSTGTEPLEEPNMSSSTSASFETWIIKLEQGVNVFLTDSVIKILDTLYRD  
RTYARFFVLETIARVPYFAMSVLHMYETFGWWRRADYLVHFAESWNEMHLLIMEELGGNSWWFDRFLAQHIATFYFMTVFLYIISPRMAYHFSECVESHAYETYDKFLKASGEE  
LKNMPAPDIAVKYYTGGDDLFLDFEQTSRTPNTRRPIENLYDVFNIRDDAEHCKTMRACQTLGSLRSPHSILEDDDEEESGCVVPEEAHCEGIVDCLKKSITS

#### TAT-translocated protein

>CAB40384.1 16 kDa polypeptide of oxygen-evolving complex [Arabidopsis thaliana]

MASMGGLHGASPAVLEGLKINGSSRLNGSGRVAVAQRSRLVRAQQSETSRRSVIGLVAAGLAGGSFVQAVLADAIKVGPPAPSGGLPGTDNSDQARDFALAKDRFYLQPLPP  
TEAAARAKESAKDIINVKPLIDRKAWPYVQNDLRKASYLRYDLNTIISPKPKDEKSKLDLTTKLFDTIDNKSPSQAKEYYAETVSALNEVLAKLG

#### SEC-translocated protein

>AAA32834.1 plastocyanin [Arabidopsis thaliana]

MAAITSATVTIPSFTGLKLAIVSSPKPLTISRSSSATRAPPKLALKSSLKDFGVIAVATAASIVLAGNAMAMEVLLGSDDGSLAFVPSFTVAKGEKIVFKNNAGFPHNVVFEDEIPSGVD  
ASKISMDETALLNGAGETYEVTLTPEGSYGFYCAPHQGAGMVGKLTVK

**Figure S6. Prediction of PTOX chloroplast-localization based on its protein sequence.** The subcellular localization of PTOX from *Eutrema salsugineum* and *Arabidopsis thaliana* was analysed using two different software predictors (TargetP-2.0<sup>1</sup> and PredSL<sup>2</sup>). As positive controls of thylakoid lumen-located proteins we used OEC16 and plastocyanin, translocated from the stroma to the lumen through the TAT and SEC pathway, respectively<sup>3,4</sup>.

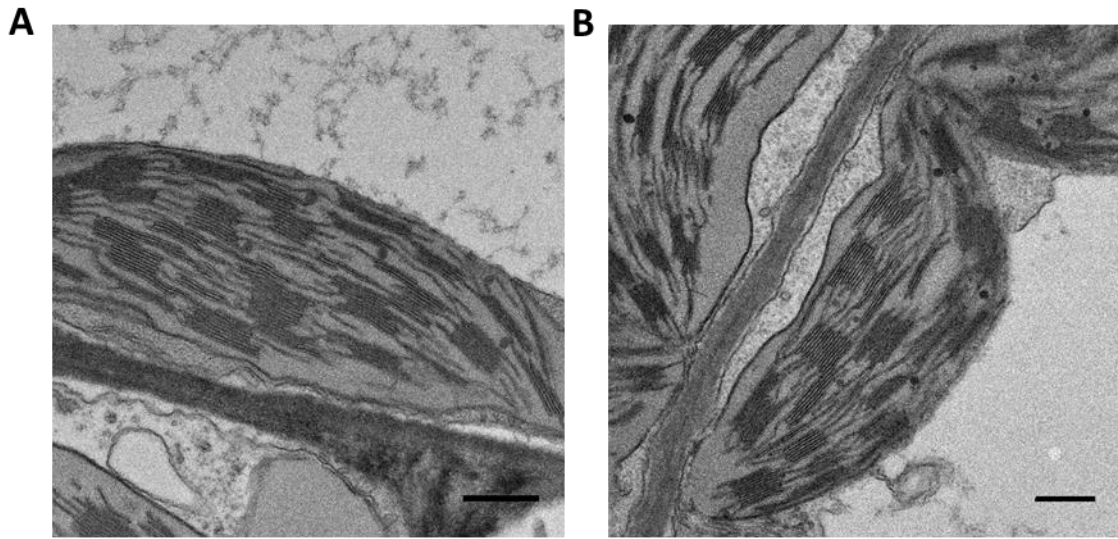

Figure S7. Chloroplast ultrastructure of *Eutrema salsugineum* plants at 0 (A) and 10 d (B) of the control treatment. Scale bars = 0.5  $\mu\text{m}$ .



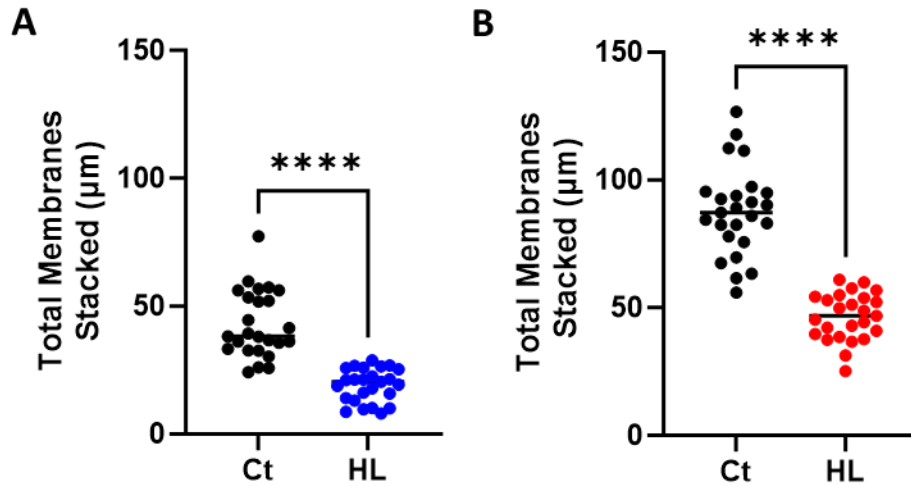

**Figure S8. Measurements of the total length of thylakoid membranes appressed within grana stacks.** The total length ( $\mu\text{m}$ ) was measured in *Eutrema* (A) and *Arabidopsis* (B) wt plants. Ct, Control treatment; HL, High light-treated plants. Measurements were performed after 10 d of HL in *Eutrema* and 12 d of HL in *Arabidopsis*. At least 25 chloroplasts were measured in each condition. A minimum of 10 non-overlapping fields of view of the ultra-thin sections were examined, and leaf pieces of two plants were fixed for the analysis. The asterisk indicates differences between Ct and HL treatments (Welch's t-test,  $p < 0.0001$ , two-sided).

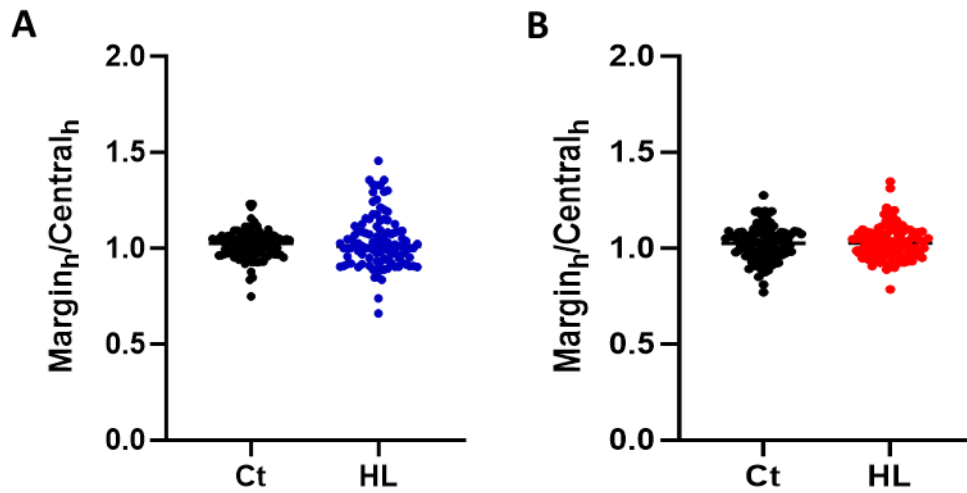

**Figure S9. Measurements of the swelling of the thylakoid grana margins under stress conditions.** The height of the central and marginal regions of the thylakoid membranes were measured, and the ratio of the latter with the former calculated in *Eutrema* (A) and *Arabidopsis* (B) wt plants. Ct, Control treatment; HL, High light-treated plants. Measurements were performed after 10 d of HL in *Eutrema* and 12 d of HL in *Arabidopsis*. At least 100 measurements were performed in each condition. A minimum of 25 non-overlapping fields of view of the ultra-thin sections were examined, and leaf pieces of two plants were fixed for the analysis.

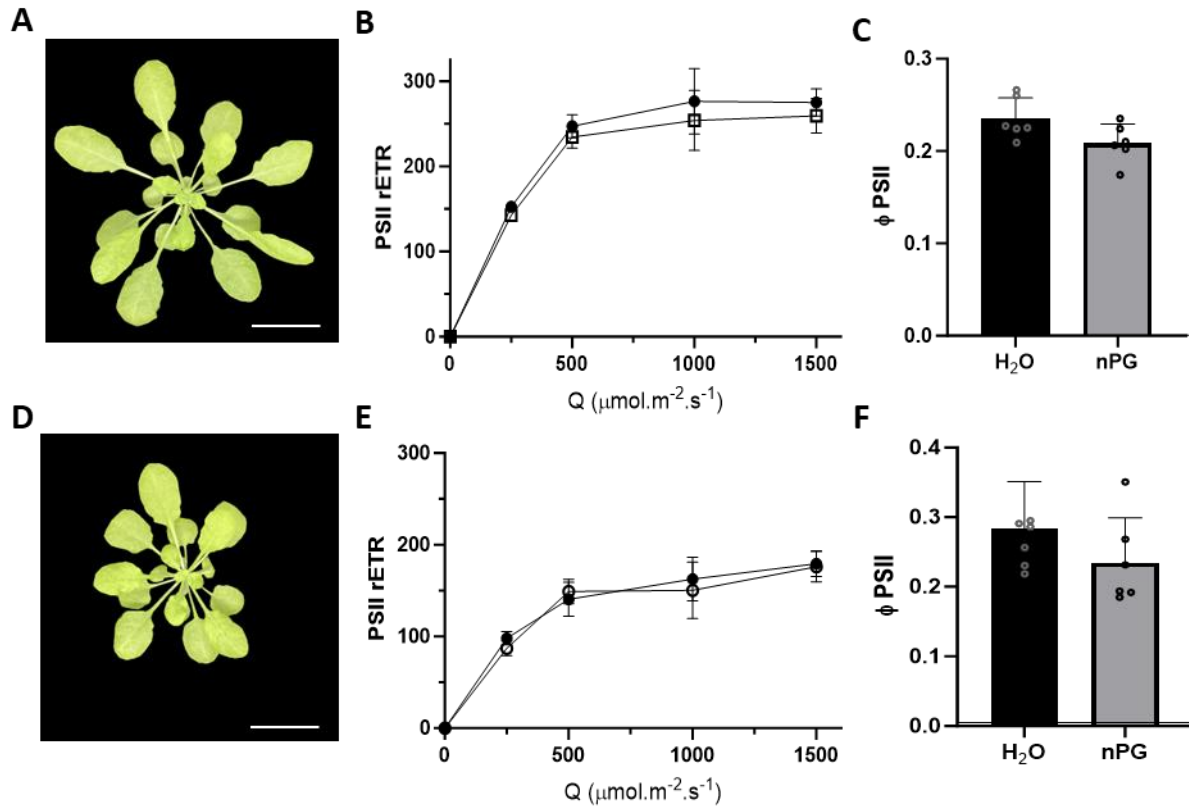

**Figure S10. PTOX activity in the Arabidopsis thylakoid stacking mutants.** Measurements were performed in *Arabidopsis chl1-3* (A-C) and *chl1-3xhcb5* (D-F) genetic backgrounds. The relative electron transport rate of PSII (PSII rETR) was measured at different light intensities, and at 21% or 1% O<sub>2</sub> (filled and empty symbols, respectively) (B and E, n = at least 3).  $\Phi$ PSII was measured in vacuum-infiltrated leaves (C and F, n = at least 6). Black bars, H<sub>2</sub>O; grey bars, 1mM nPG. Data are the mean  $\pm$  SD of independent biological replicates. White scale bar = 2 cm. All raw data, with number of replicates per data point, are provided in the source data file.

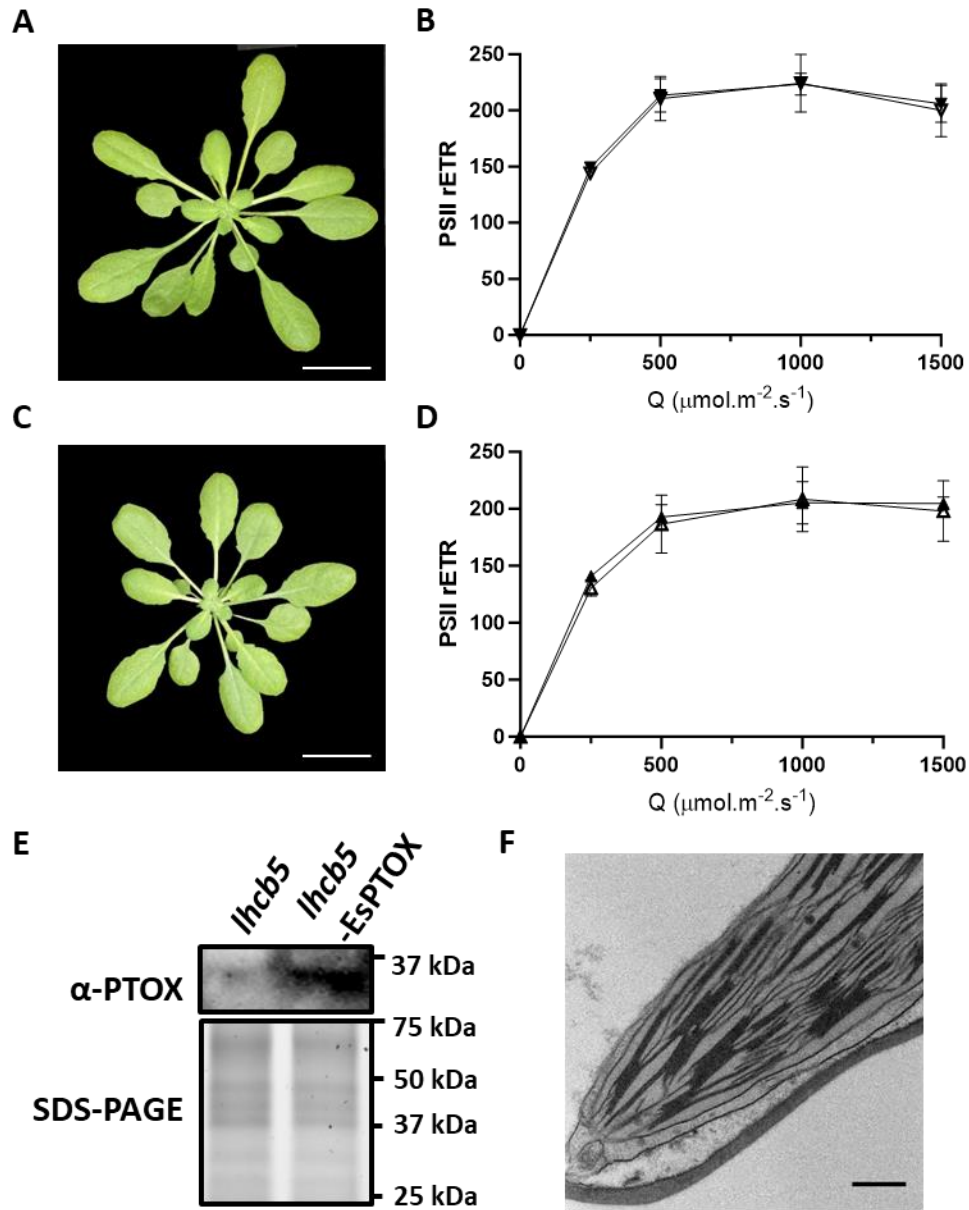

**Figure S11. PTOX activity in the *lhcb5* Arabidopsis genetic background.** Measurements were performed in the *lhcb5* Arabidopsis genetic background non-expressing (A,B) or expressing EsPTOX (C,D). White scale bar in A and C = 2 cm. The relative electron transport rate of PSII (PSII rETR) was measured at different light intensities, and at 21% or 1% O<sub>2</sub> (filled and empty symbols, respectively) (B and D). E. PTOX protein content in the *lhcb5* lines (loaded protein = 60  $\mu\text{g}$ ). Immunoblots were repeated twice, independently, obtaining the same results. F. Chloroplast ultrastructure of *lhcb5*-EsPTOX leaves. Scale bars = 0.5  $\mu\text{m}$ . Data are the mean  $\pm$  SD of at least 5 biological replicates. All raw data, with number of replicates per data point, are provided in the source data file.

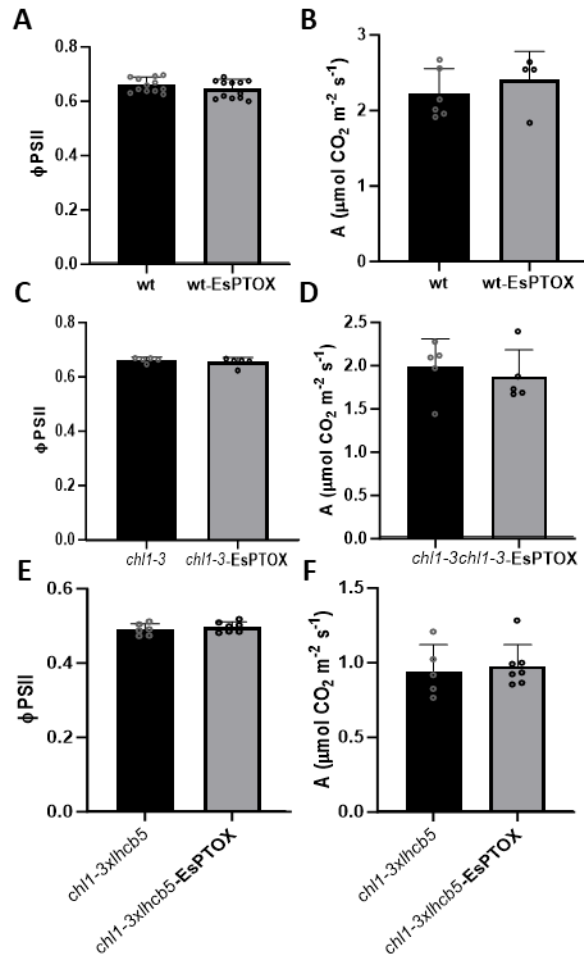

**Figure S12. The effect of EsPTOX expression on photosynthetic assimilation rates in the Arabidopsis thylakoid stacking mutants under growth conditions.** Quantum yield of PSII ( $\Phi_{PSII}$ ) and assimilation (A,  $\mu\text{mol CO}_2 \cdot \text{m}^{-2} \cdot \text{s}^{-1}$ ) of wt and wt-EsPTOX (A, B), *chl1-3* and *chl1-3-EsPTOX* (C, D), and *chl1-3xlhcb5* and *chl1-3xlhcb5-EsPTOX* (E, F). Measurements were taken under growing conditions of  $\text{CO}_2$  and light ( $400 \text{ CO}_2 \text{ ppm}$  and  $100 \mu\text{mol} \cdot \text{m}^{-2} \cdot \text{s}^{-1}$ ). Data are the mean  $\pm$  SD of at least 4 biological replicates. All raw data, with number of replicates per data point, are provided in the source data file.

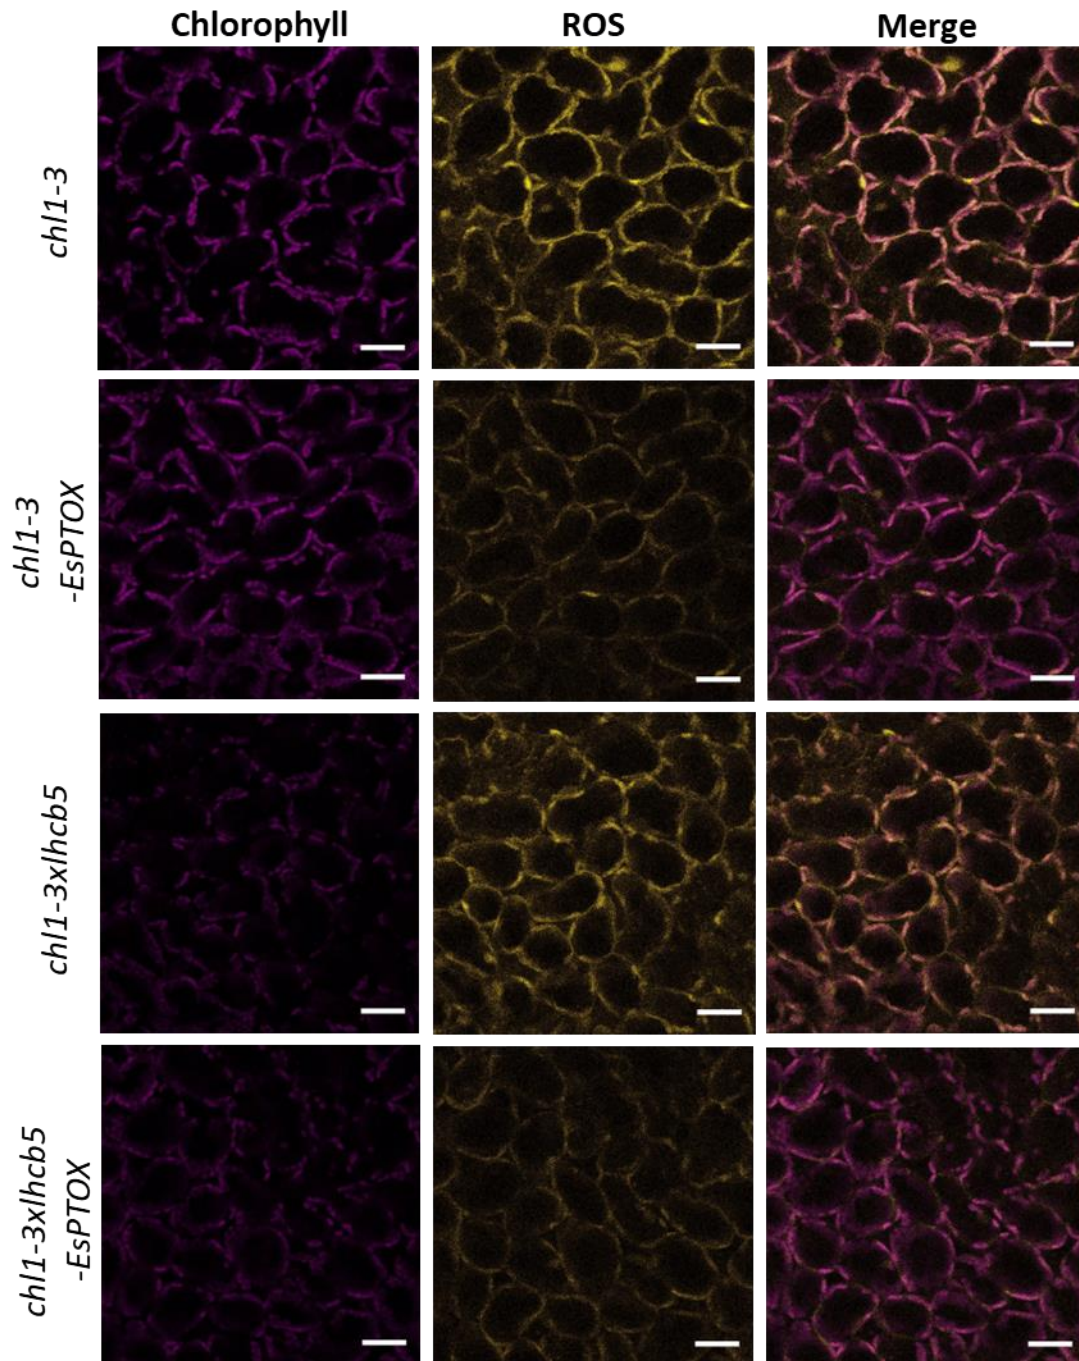

**Figure S13. ROS subcellular localization in the Arabidopsis thylakoid stacking mutants under stress.** Representative images from confocal laser microscopy showing subcellular localization of the DCF-DA fluorescence (yellow) and chlorophyll autofluorescence (magenta) in the *chl1-3* and *chl1-3x/hcb5* Arabidopsis genetic backgrounds subjected to stress conditions. Scale bars = 35  $\mu$ m.



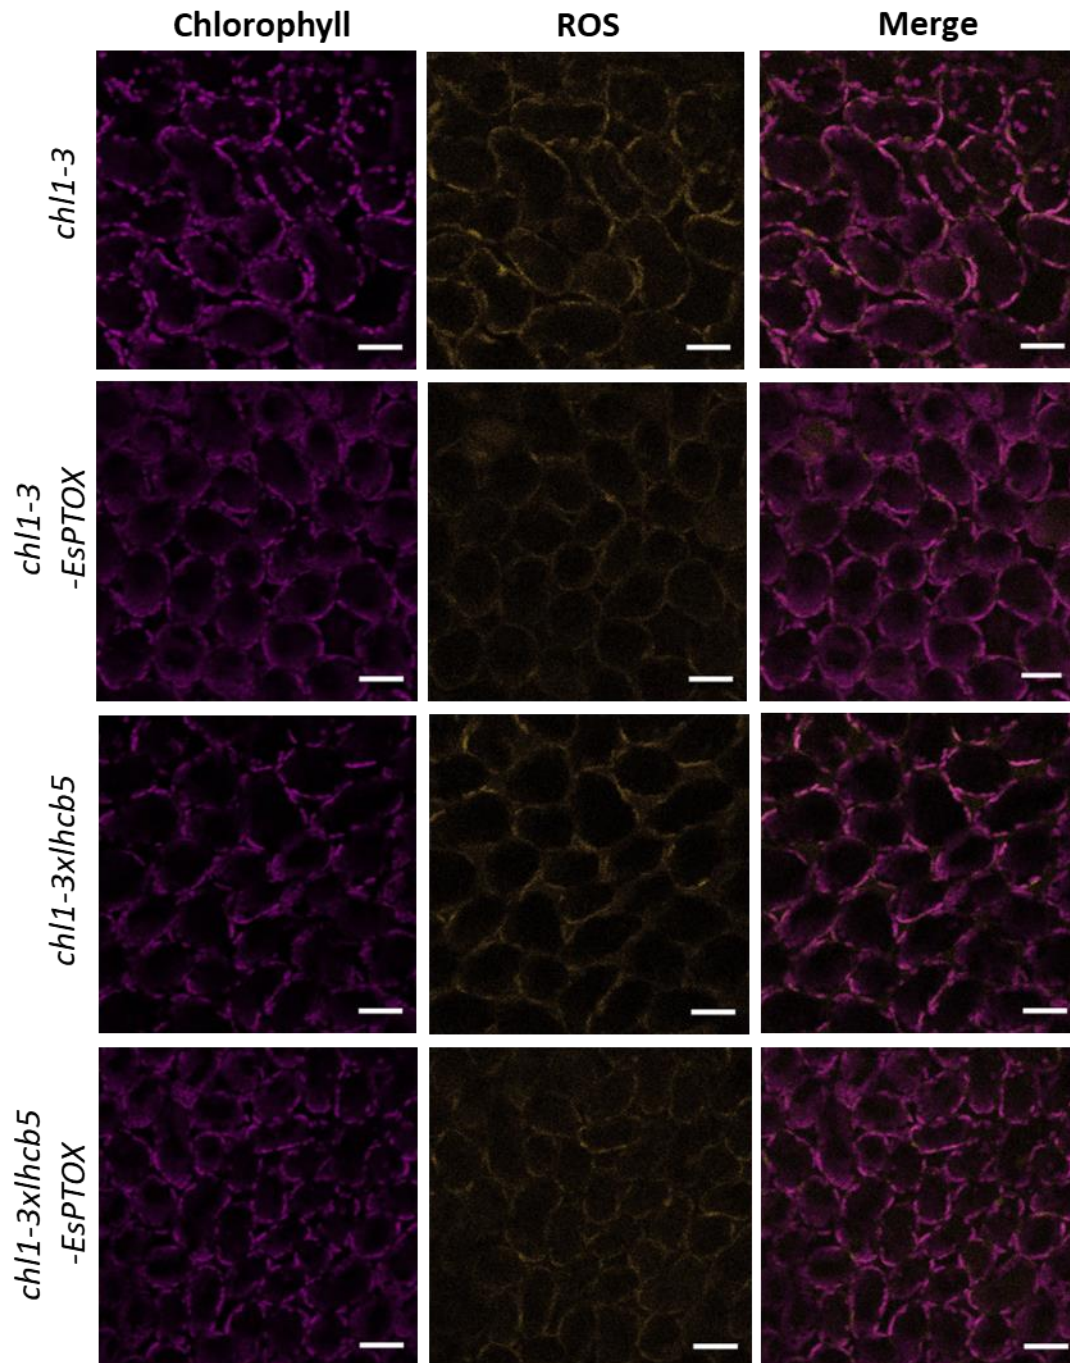

**Figure S14. ROS subcellular localization in the Arabidopsis thylakoid stacking mutants under control.** Representative images from confocal laser microscopy showing subcellular localization of the DCF-DA fluorescence (yellow) and chlorophyll autofluorescence (magenta), in the *chl1-3* and *chl1-3x/hcb5* Arabidopsis genetic backgrounds subjected to control conditions. Scale bars = 35  $\mu$ m.

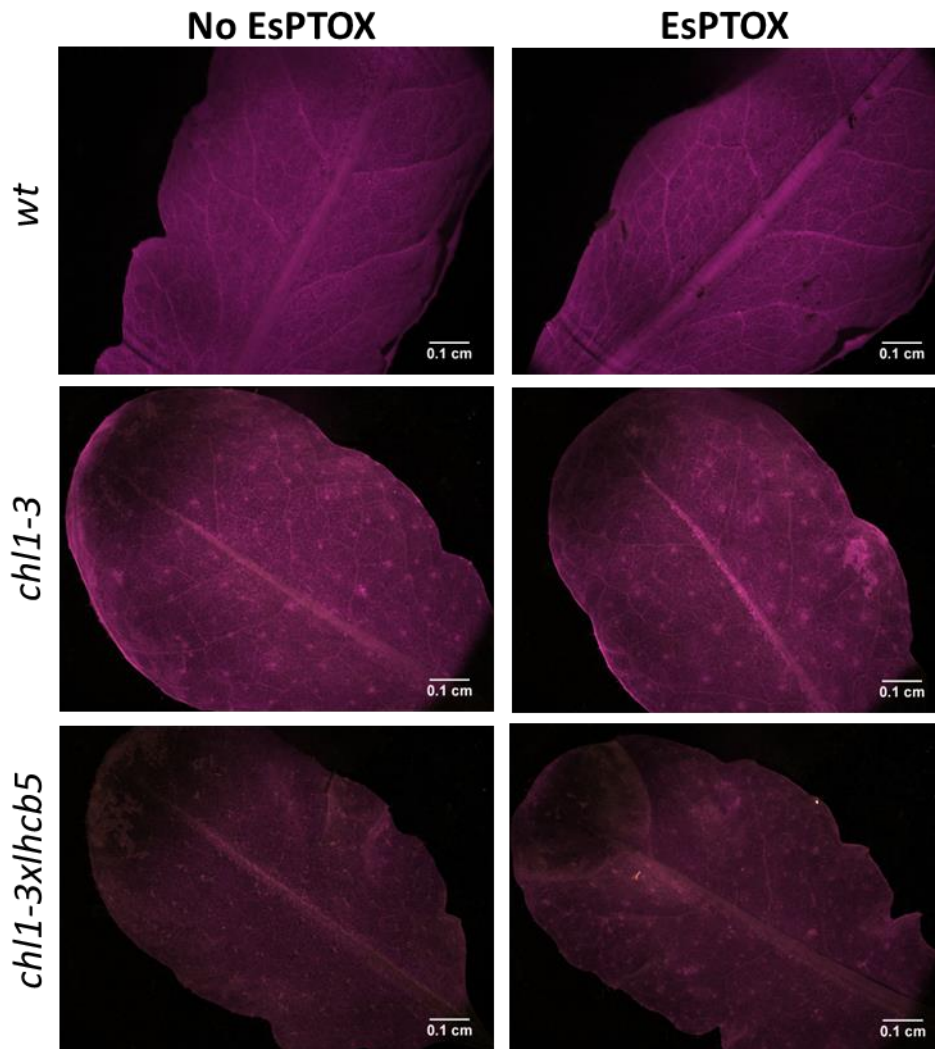

**Figure S15. Absence of ROS fluorescence signal in Arabidopsis leaves not infiltrated with DFC-DA.** Representative images of leaves observed under the epifluorescence microscope. Magenta fluorescence corresponds to chlorophyll autofluorescence. Scale bars = 0.1 cm.



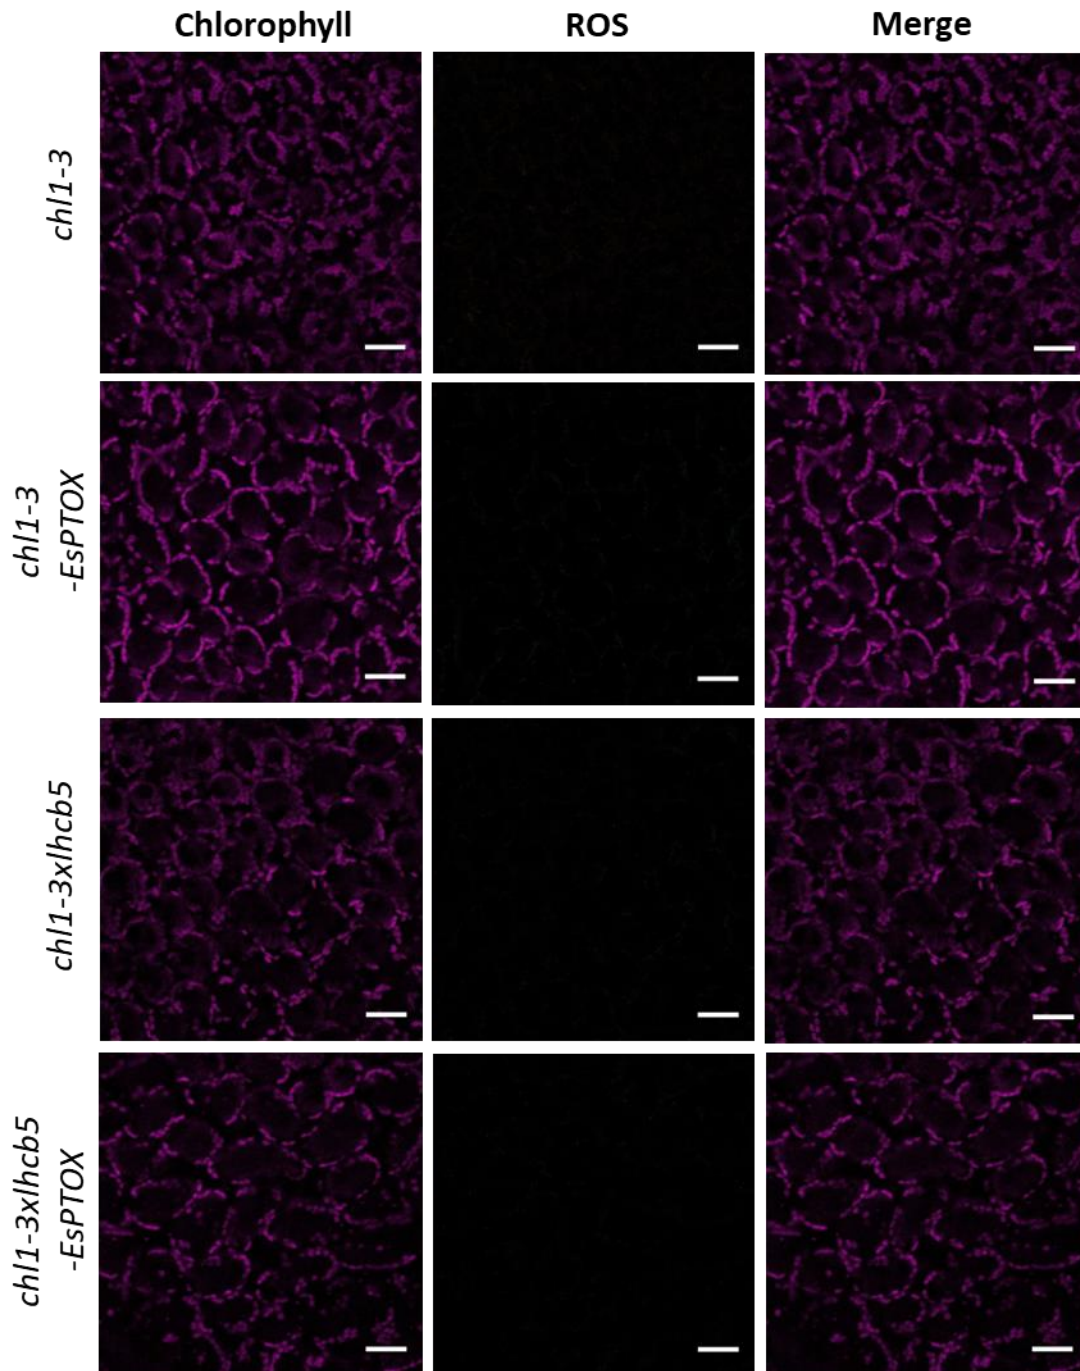

**Figure S16. Absence of ROS fluorescence signals in Arabidopsis leaves not infiltrated with DCF-DA.** Representative images of laser confocal microscopy of the *chl1-3* and *chl1-3xlhcb5* Arabidopsis genetic backgrounds subjected to stress conditions, but not infiltrated with DCF-DA. Magenta fluorescence corresponds to chlorophyll autofluorescence. Scale bars = 35  $\mu$ m.

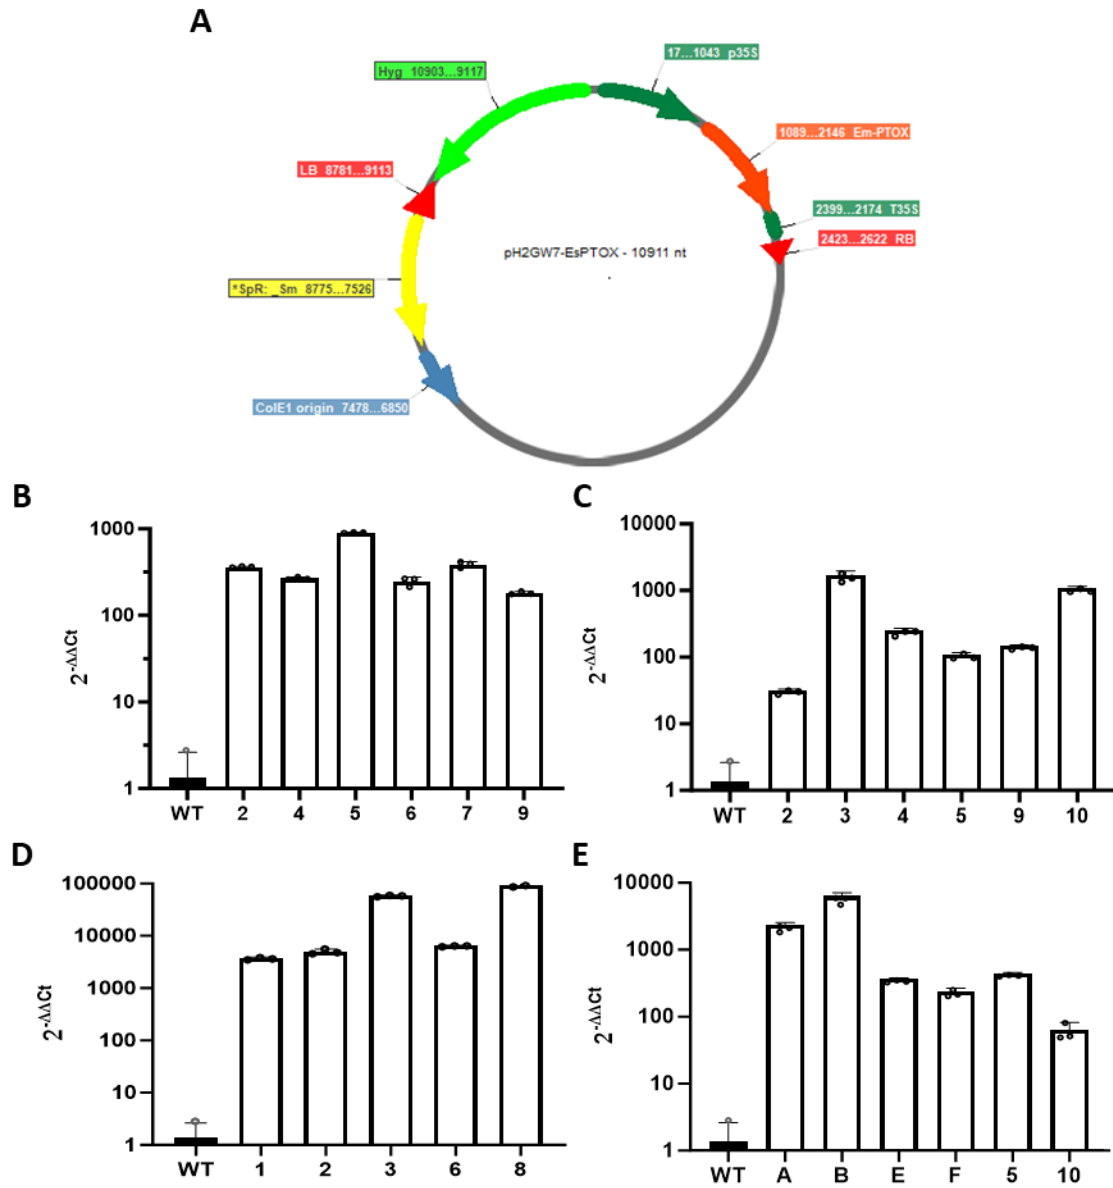

**Figure S17. Transformation of *Arabidopsis thaliana* with EsPTOX.** **A.** The pH2GW7-EsPTOX expression vector used for the transformation of Arabidopsis wt, *chl1-3*, *lhcb5* and *chl1-3xlhcb5* plants, by floral dipping. Expression of the gene was driven under control of the cauliflower mosaic virus (CaMV) 35S constitutive promoter. Hygromycin resistance gene (Hyg) was included for *in planta* selection of transgenic lines. **B-E.** EsPTOX expression levels of the different independent lines obtained from Arabidopsis wt (**B**), *lhcb5* (**C**), *chl1-3* (**D**) and *chl1-3xlhcb5* (**E**) transformation. Data are the mean  $\pm$  SD of 3 biological replicates. Values were normalized to the expression levels of EsPTOX measured for the wt plants. Primers used are listed in Supp. Table 2.

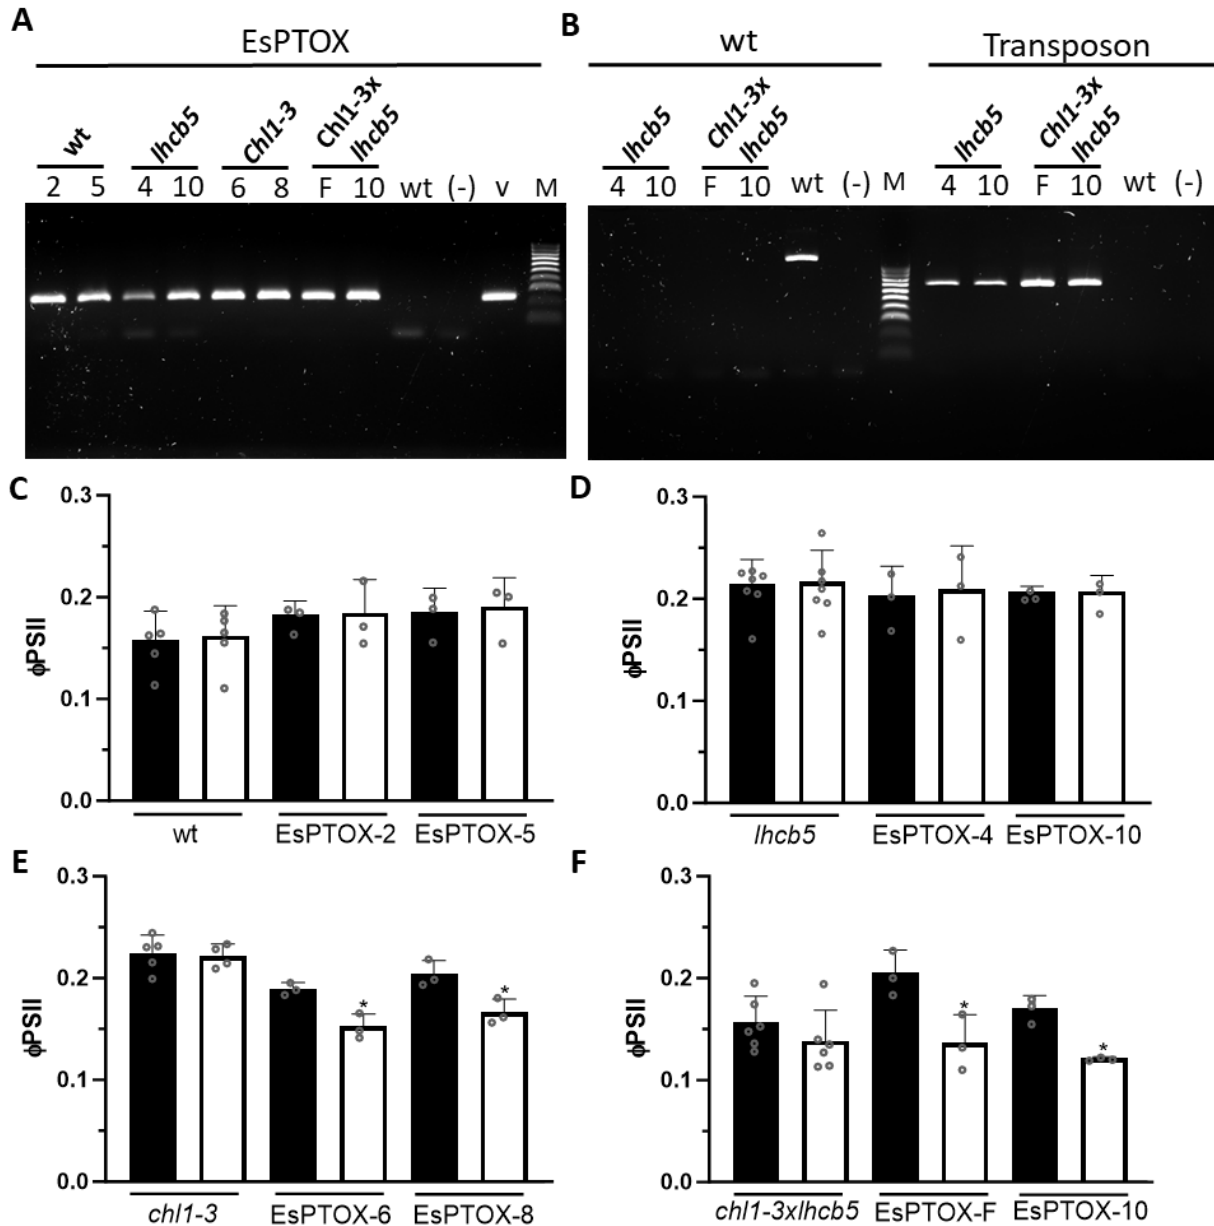

**Figure S18. Genotyping and phenotyping of 2 independent EsPTOX transgenic lines, for each of the different Arabidopsis genetic backgrounds studied.** PCR analysis to detect EsPTOX insertion (A) or homozygosity of *lhcb5* mutation (B). Images show representative PCR products resolved by 2% agarose gel electrophoresis. M, Molecular marker Hyperladder™100bp (Meridian Bioscience, OH, USA); v; pH2GW7-EsPTOX expression vector; (-), PCR negative control; wt, Arabidopsis Col-0. EsPTOX detection PCR was performed using the P35S-Fw and Ins-EsPTOX-Rv primers (Supp. Table 2), and an annealing temperature of 62 °C. Amplicon expected size: 254 bp. For the *lhcb5* genotyping, wt allele was identified by using the *lhcb5*-Fw and *lhcb5*-Rv primers, while the mutant allele by using the T-DNA-Fw and *lhcb5*-Rv primers (Supp. Table 2). In both cases the annealing temperature was 50 °C, and the expected amplicon size ≈900 and 400 bp, respectively (<http://signal.salk.edu/tdnaprimers.2.html>). C-F. Quantum yield of PSII ( $\Phi_{PSII}$ ) measured at 21% or 1% O<sub>2</sub> (black and white bars, respectively) in the different genetic backgrounds non-expressing or expressing EsPTOX. Oxygen sensitivity of  $\Phi_{PSII}$  suggests PTOX activity. C, Arabidopsis wt background; D, *lhcb5* background; E, *chl1-3* background; F, *chl1-3x lhcb5* background. Data are the mean ± SD of at least 3 biological replicates. The asterisk indicates differences between the measurements at 21% and 1% O<sub>2</sub>, in each case (Student's test,  $p < 0.05$ , two-sided). All raw data, with number of replicates per data point, are provided in the source data file.

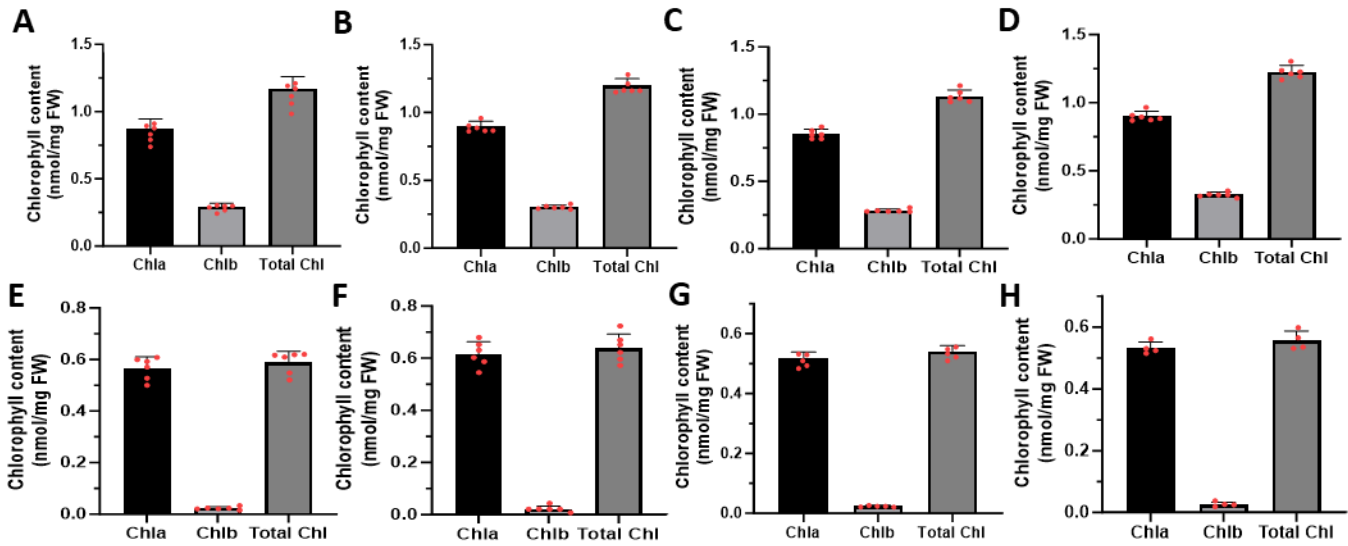

**Figure S19. Chlorophyll content of the different *Arabidopsis* genetic background studied.** Chlorophyll content (nmol.mg<sup>-1</sup> FW) was measured in the *Arabidopsis* wt and wt-EsPTOX (A and B, respectively), *lhcb5* and *lhcb5*-EsPTOX (C and D, respectively), *chl1-3* and *chl1-3*-EsPTOX (E and F, respectively), and *chl1-3lhcb5* and *chl1-3lhcb5*-EsPTOX (G and H, respectively). Data are the mean ± SD of at least 4 biological replicates. All raw data, with number of replicates per data point, are provided in the source data file.

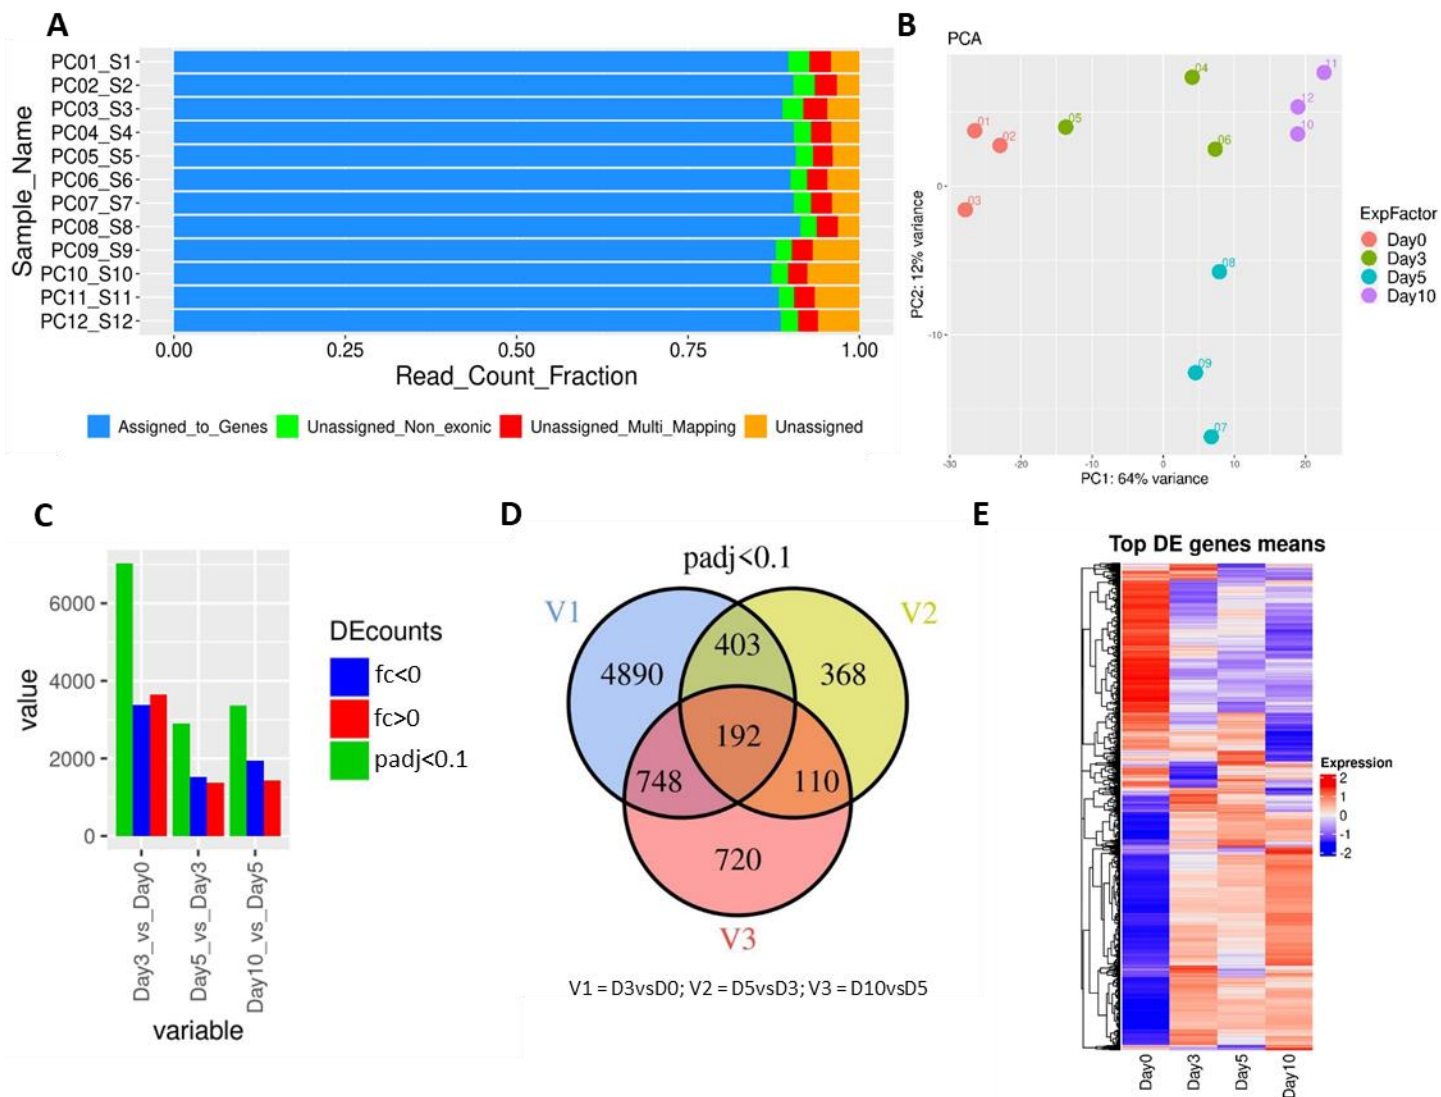

**Figure S20. Time-course RNAseq analysis of *Eutrema salsugineum* plants acclimated to high light. A.** Mapping and gene assignment of the total reads generated by the RNAseq, for each of the sequenced samples. **B.** Principal components analysis (PCA) plot showing the variance of the 12 sequenced samples along the high light treatment (4 time points,  $n = 3$ ). **C.** Differentially expressed genes ( $\text{padj} < 0.1$ ) between Day 3 and Day 0 (6,233), Day 5 and Day 3 (1,073), and Day 10 and Day 5 (1,770). From them, 2,944 and 3,289, 563 and 510, and 1,124 and 646, were down and up-regulated respectively ( $\text{fc} < 0$ ;  $\text{fc} > 0$ ). **D.** Venn diagram showing the differentially expressed genes ( $\text{padj} < 0.1$ ) shared between the different days comparison. **E.** Hierarchical cluster of the differentially expressed genes ( $\text{padj} < 0.1$ ) along the different days of the high light treatment.

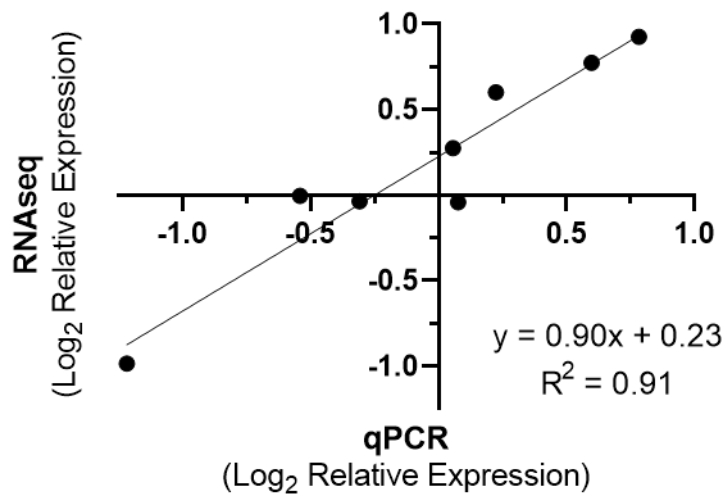

**Figure S21. Time-course RNAseq validation by qPCR.** Comparison of RNAseq and quantitative real-time PCR data for 3 independent genes which were classified in different expression clusters (*Thhalv10025624m* -PTOX-, *Thhalv10022631m* and *Thhalv10026385m*). Symbols represent Log<sub>2</sub> transformation of mean expression levels relative to day 0.

**Supplementary Table 1.** Annotation of the genes enriched in GO terms related to the chloroplast in the 'Cellular Compartment' category.

| Classification group | Gene ID         | Arabidopsis Homologue | KEGG Annotation (KO) <sup>1</sup> | TAIR Definition <sup>2</sup>                                                                            | Cluster |
|----------------------|-----------------|-----------------------|-----------------------------------|---------------------------------------------------------------------------------------------------------|---------|
| Response to Stress   | Thhalv10014567m | AT5G07020             | null                              | MAINTENANCE OF PSII UNDER HIGH LIGHT 1 (MPH1)                                                           | 2       |
|                      | Thhalv10026482m | AT4G34190             | null                              | STRESS ENHANCED PROTEIN 1 (SEP1)                                                                        | 2       |
|                      | Thhalv10028953m | AT4G02530             | null                              | MAINTENANCE OF PHOTOSYSTEM II UNDER HIGH LIGHT 2 (MPH2)                                                 | 2       |
|                      | Thhalv10016600m | AT2G39730             | null                              | RUBISCO ACTIVASE (RCA)                                                                                  | 2       |
|                      | Thhalv10027805m | AT5G38520             | null                              | CHLOROPHYLL DEPHYTYLASE1 (CLD1)                                                                         | 2       |
|                      | Thhalv10008704m | AT1G34000             | null                              | ONE-HELIX PROTEIN 2 (OHP2)                                                                              | 2       |
|                      | Thhalv10000983m | AT5G44650             | null                              | CHLOROPLAST PROTEIN-ENHANCING STRESS TOLERANCE (CEST)                                                   | 2       |
|                      | Thhalv10014048m | AT5G03880             | null                              | THIOREDOXIN FAMILY PROTEIN, LOCATED IN CHLOROPLAST, CHANGE IN RESPONSE TO H <sub>2</sub> O <sub>2</sub> | 2       |
|                      | Thhalv10013154m | AT5G12860             | null                              | DICARBOXYLATE TRANSPORTER 1 (DiT1)                                                                      | 2       |
|                      | Thhalv10023228m | AT1G56500             | null                              | SUPPRESSOR OF QUENCHING 1 (SOQ1)                                                                        | 2       |
|                      | Thhalv10025684m | AT4G31530             | null                              | RELAXATION OF QH (ROQH)                                                                                 | 2       |
|                      | Thhalv10023608m | AT1G54520             | null                              | FLUCTUATING-LIGHT- ACCLIMATION PROTEIN1 (FLAP1)                                                         | 2       |
|                      | Thhalv10006607m | AT1G01790             | null                              | K <sup>+</sup> EFFLUX ANTIporter 1 (KEA1)                                                               | 2       |
|                      | Thhalv10028551m | AT4G00370             | null                              | ANION TRANSPORTER 2 (ANTR2)                                                                             | 2       |
|                      | Thhalv10021501m | AT3G26060             | K03564                            | THIOREDOXIN SUPERFAMILY PROTEIN                                                                         | 2       |
|                      | Thhalv10026218m | AT4G25100             | K04564                            | FE SUPEROXIDE DISMUTASE 1 (FSD1)                                                                        | 1       |
|                      | Thhalv10025624m | AT4G22260             | K17893                            | PLASTID TERMINAL OXIDASE (PTOX)                                                                         | 1       |
| Thhalv10010497m      | AT3G47860       | null                  | CHLOROPLASTIC LIPOCALIN (LCNP)    | 2                                                                                                       |         |
| Classification group | Gene ID         | Arabidopsis Homologue | KEGG Annotation (KO) <sup>1</sup> | TAIR Definition <sup>2</sup>                                                                            | Cluster |
| Cyclic electron flow | Thhalv10025739m | AT4G22890             | null                              | PGR5-LIKE A                                                                                             | 2       |
|                      | Thhalv10014691m | AT5G58260             | null                              | NADH DEHYDROGENASE-LIKE COMPLEX N (NdhN)                                                                | 2       |
|                      | Thhalv10002670m | AT2G04039             | null                              | NDHV                                                                                                    | 2       |
|                      | Thhalv10005039m | AT2G01590             | null                              | CHLORORESPIRATORY REDUCTION 3 (CRR3)                                                                    | 2       |
|                      | Thhalv10019160m | AT1G70760             | null                              | NADH DEHYDROGENASE-LIKE COMPLEX L (NdhL)                                                                | 2       |

|                             |                 |                              |                                         |                                                   |                |
|-----------------------------|-----------------|------------------------------|-----------------------------------------|---------------------------------------------------|----------------|
|                             | Thhalv10002723m | AT2G05620                    | null                                    | PROTON GRADIENT REGULATION 5 (PGR5)               | 2              |
|                             | Thhalv10003269m | AT5G43750                    | null                                    | PHOTOSYNTHETIC NDH SUBCOMPLEX B 5 (PnsB5)         | 2              |
|                             | Thhalv10018808m | AT1G64770                    | null                                    | PHOTOSYNTHETIC NDH SUBCOMPLEX B 2 (PnsB2)         | 2              |
|                             | Thhalv10026209m | AT4G37925                    | null                                    | NADH DEHYDROGENASE-LIKE COMPLEX M (NdhM)          | 2              |
|                             | Thhalv10021523m | AT3G16250                    | null                                    | PHOTOSYNTHETIC NDH SUBCOMPLEX B 3 (PnsB3)         | 2              |
|                             | Thhalv10019178m | AT1G74880                    | null                                    | NADH DEHYDROGENASE-LIKE COMPLEX ) (NdhO)          | 2              |
|                             | Thhalv10017187m | AT2G39470                    | null                                    | PHOTOSYNTHETIC NDH SUBCOMPLEX L 1 (PnsL1)         | 2              |
|                             | Thhalv10014707m | AT5G52780                    | null                                    | PAM68-LIKE (PAM68L)                               | 2              |
|                             | Thhalv10028695m | AT4G11960                    | null                                    | PGR5-LIKE B (PGRL1B)                              | 2              |
|                             | Thhalv10008902m | AT1G18730                    | null                                    | PHOTOSYNTHETIC NDH SUBCOMPLEX B 4 (PnsB4)         | 2              |
| <b>Classification group</b> | <b>Gene ID</b>  | <b>Arabidopsis Homologue</b> | <b>KEGG Annotation (KO)<sup>1</sup></b> | <b>TAIR Definition<sup>2</sup></b>                | <b>Cluster</b> |
| <b>Photorespiration</b>     | Thhalv10019199m | AT5G38410                    | K01602                                  | RUBISCO SMALL SUBUNIT 3B (RBCS3B)                 | 2              |
|                             | Thhalv10024934m | AT4G37930                    | K00600                                  | SERINE TRANSHYDROXYMETHYLTRANSFERASE 1 (SHM1)     | 2              |
|                             | Thhalv10027955m | AT5G38410                    | K01602                                  | RUBISCO SMALL SUBUNIT 3B (RBCS3B)                 | 2              |
|                             | Thhalv10019202m | AT5G38430                    | K01602                                  | RUBISCO SMALL SUBUNIT 1A (RBCS1A)                 | 2              |
|                             | Thhalv10007514m | AT1G23310                    | K14272                                  | ALANINE-2-OXOGLUTARATE AMINOTRANSFERASE 1 (AOAT1) | 2              |
|                             | Thhalv10022711m | AT2G13360                    | K00830                                  | ALANINE:GLYOXYLATE AMINOTRANSFERASE (AGT1)        | 2              |
|                             | Thhalv10018474m | AT1G70580                    | K14272                                  | ALANINE-2-OXOGLUTARATE AMINOTRANSFERASE 2 (AOAT2) | 2              |
|                             | Thhalv10024257m | AT4G33010                    | K00281                                  | GLYCINE DECARBOXYLASE P-PROTEIN 1 (GLDP1)         | 2              |
|                             | Thhalv10007781m | AT1G11860                    | K00605                                  | AMINOMETHYLTRANSFERASE (GLDT)                     | 2              |
|                             | Thhalv10008944m | AT1G32470                    | K02437                                  | GDC-H1                                            | 2              |
|                             | Thhalv10017333m | AT1G32470                    | K02437                                  | GDC-H1                                            | 2              |
|                             | Thhalv10001891m | AT2G26080                    | K00281                                  | GLYCINE DECARBOXYLASE P-PROTEIN 2 (GLDP2)         | 2              |
|                             | Thhalv10018534m | AT1G68010                    | K15893                                  | HYDROXYPYRUVATE REDUCTASE (HPR)                   | 2              |



|                                                   |                 |                              |                                         |                                                              |                |
|---------------------------------------------------|-----------------|------------------------------|-----------------------------------------|--------------------------------------------------------------|----------------|
|                                                   | Thhalv10020979m | AT3G14420                    | K11517                                  | GLYCOLATE OXIDASE 1 (GOX1)                                   | 2              |
|                                                   | Thhalv10020982m | AT3G14415                    | K11517                                  | GLYCOLATE OXIDASE 2 (GOX2)                                   | 2              |
| <b>Classification group</b>                       | <b>Gene ID</b>  | <b>Arabidopsis Homologue</b> | <b>KEGG Annotation (KO)<sup>1</sup></b> | <b>TAIR Definition<sup>2</sup></b>                           | <b>Cluster</b> |
| <b>CBB Cycle</b>                                  | Thhalv10000191m | AT2G21330                    | K01623                                  | FRUCTOSE-BISPHOSPHATE ALDOLASE 1 (FBA1)                      | 2              |
|                                                   | Thhalv10019199m | AT5G38410                    | K01602                                  | RUBISCO SMALL SUBUNIT 3B (RBCS3B)                            | 2              |
|                                                   | Thhalv10025379m | AT4G38970                    | K01623                                  | FRUCTOSE-BISPHOSPHATE ALDOLASE 2 (FBA2)                      | 2              |
|                                                   | Thhalv10020621m | AT3G12780                    | K00927                                  | PHOSPHOGLYCERATE KINASE 1 (PGKP1)                            | 2              |
|                                                   | Thhalv10021298m | AT3G04790                    | K01807                                  | EMBRYO DEFECTIVE 3119 (EMB3119)                              | 2              |
|                                                   | Thhalv10027955m | AT5G38410                    | K01602                                  | RUBISCO SMALL SUBUNIT 3B (RBCS3B)                            | 2              |
|                                                   | Thhalv10019202m | AT5G38430                    | K01602                                  | RIBULOSE BISPHOSPHATE CARBOXYLASE SMALL CHAIN 1A (RBCS1A)    | 2              |
|                                                   | Thhalv10004764m | AT3G04790                    | K01807                                  | EMBRYO DEFECTIVE 3119 (EMB3119)                              | 2              |
|                                                   | Thhalv10021083m | AT1G13440                    | K00134                                  | GLYCERALDEHYDE-3-PHOSPHATE DEHYDROGENASE C-2 (GAPC2)         | 1              |
|                                                   | Thhalv10008131m | AT1G13440                    | K00134                                  | GLYCERALDEHYDE-3-PHOSPHATE DEHYDROGENASE C-2 (GAPC2)         | 2              |
|                                                   | Thhalv10004217m | AT1G42970                    | K05298                                  | GLYCERALDEHYDE-3-PHOSPHATE DEHYDROGENASE B SUBUNIT (GAPB)    | 2              |
|                                                   | Thhalv10010434m | AT3G55800                    | K01100                                  | SEDOHEPTULOSE-BISPHOSPHATASE (SBPASE)                        | 2              |
|                                                   | Thhalv10007801m | AT1G32060                    | K00855                                  | PHOSPHORIBULOKINASE (PRK)                                    | 2              |
|                                                   | Thhalv10004349m | AT3G26650                    | K05298                                  | GLYCERALDEHYDE 3-PHOSPHATE DEHYDROGENASE A SUBUNIT 1 (GAPA1) | 2              |
| <b>Classification group</b>                       | <b>Gene ID</b>  | <b>Arabidopsis Homologue</b> | <b>KEGG Annotation (KO)<sup>1</sup></b> | <b>TAIR Definition<sup>2</sup></b>                           | <b>Cluster</b> |
| <b>Protein synthesis, folding and degradation</b> | Thhalv10026156m | AT4G19830                    | null                                    | FK506-binding proteins (FKBP17-1)                            | 2              |
|                                                   | Thhalv10026111m | AT4G25370                    | null                                    | CLP chaperone-protease (CLPT1)                               | 2              |
|                                                   | Thhalv10027761m | AT5G39830                    | null                                    | DEG PROTEASE 8 (DEG8)                                        | 2              |
|                                                   | Thhalv10004246m | AT3G27925                    | null                                    | DEGP PROTEASE 1 (DEG1)                                       | 2              |
|                                                   | Thhalv10024882m | AT4G17740                    | null                                    | CTPA                                                         | 2              |
|                                                   | Thhalv10016805m | AT2G35260                    | null                                    | BALANCE OF CHLOROPHYLL METABOLISM 1 (BCM1)                   | 2              |
|                                                   | Thhalv10017977m | AT2G32480                    | null                                    | ARABIDOPSIS SERIN PROTEASE (ARASP)                           | 2              |

|                             |                 |                              |                                         |                                                                   |                |
|-----------------------------|-----------------|------------------------------|-----------------------------------------|-------------------------------------------------------------------|----------------|
|                             | Thhalv10004302m | AT5G30510                    | K02945                                  | PLASTID RIBOSOMAL PROTEIN S1 (PRPS1)                              | 2              |
|                             | Thhalv10006062m | AT3G63490                    | K02863                                  | PLASTID RIBOSOMAL PROTEIN L1, PROLINE-RICH PROTEIN-LIKE 1 (PRPL1) | 2              |
|                             | Thhalv10004960m | AT3G27850                    | K02935                                  | RIBOSOMAL PROTEIN BL12CX (BL12CX)                                 | 2              |
|                             | Thhalv10019066m | AT1G78630                    | K02871                                  | RIBOSOMAL PROTEIN UL13C (UL13C)                                   | 2              |
|                             | Thhalv10008395m | AT1G07320                    | K02926                                  | PLASTID RIBOSOMAL PROTEIN L4 (PRPL4)                              | 2              |
|                             | Thhalv10023690m | AT1G64510                    | K02990                                  | PLASTID RIBOSOMAL PROTEIN OF THE 30S SUBUNIT 6 (PRPS6)            | 2              |
|                             | Thhalv10005022m | AT5G65220                    | K02904                                  | PLASTID RIBOSOMAL PROTEINS OF THE 50S SUBUNIT 29 (PRPL29)         | 2              |
|                             | Thhalv10013384m | AT5G14590                    | K00031                                  | ISOCITRATE/ISOPROPYLMALATE DEHYDROGENASE                          | 2              |
|                             | Thhalv10013566m | AT5G20070                    | K03426                                  | NUDIX HYDROLASE HOMOLOG 19 (NUDX19)                               | 2              |
|                             | Thhalv10004964m | AT3G27830                    | K02935                                  | RIBOSOMAL PROTEIN BL12CZ (BL12CZ)                                 | 1              |
|                             | Thhalv10019289m | AT1G79850                    | K02961                                  | PLASTID RIBOSOMAL SMALL SUBUNIT PROTEIN 17 (PRPS17)               | 1              |
|                             | Thhalv10000978m | AT5G45390                    | K01358                                  | CLP PROTEASE P4 (CLPP4)                                           | 1              |
| <b>Classification group</b> | <b>Gene ID</b>  | <b>Arabidopsis Homologue</b> | <b>KEGG Annotation (KO)<sup>1</sup></b> | <b>TAIR Definition<sup>2</sup></b>                                | <b>Cluster</b> |
| <b>PETC biogenesis</b>      | Thhalv10021289m | AT3G05410                    | null                                    | PHOTOSYSTEM II REACTION CENTER PSBP FAMILY PROTEIN (PPD7)         | 2              |
|                             | Thhalv10000353m | AT2G23670                    | null                                    | HOMOLOG OF SYNECHOCYSTIS (YCF37)                                  | 2              |
|                             | Thhalv10013940m | AT5G54290                    | null                                    | CYTOCHROME C BIOGENESIS PROTEIN FAMILY (CCDA)                     | 2              |
|                             | Thhalv10018960m | AT1G71500                    | null                                    | PHOTOSYSTEM B PROTEIN 33 (PSB33)                                  | 2              |
|                             | Thhalv10000289m | AT1G77090                    | null                                    | PSII PSBP FAMILY PROTEIN                                          | 2              |
|                             | Thhalv10002049m | AT2G20890                    | null                                    | PHOTOSYSTEM II REACTION CENTER PSB29 PROTEIN (PSB29)              | 2              |
|                             | Thhalv10021570m | AT3G17930                    | null                                    | DEFECTIVE ACCUMULATION OF CYTOCHROME B6/F COMPLEX (DAC)           | 2              |
|                             | Thhalv10008840m | AT1G05385                    | null                                    | LOW PSII ACCUMULATION 19 (LPA19)                                  | 2              |
|                             | Thhalv10014231m | AT5G11450                    | null                                    | PSBP DOMAIN PROTEIN 5 (PPD5)                                      | 2              |
|                             | Thhalv10017283m | AT2G34860                    | null                                    | EMBRYO SAC DEVELOPMENT ARREST 3 (EDA3)                            | 2              |
|                             | Thhalv10002100m | AT2G27290                    | null                                    | DE-ETIOLATION-INDUCED PROTEIN 1 (DEIP1)                           | 2              |

|  |                 |           |        |                                                   |   |
|--|-----------------|-----------|--------|---------------------------------------------------|---|
|  | Thhalv10012349m | AT2G34860 | null   | EMBRYO SAC DEVELOPMENT ARREST 3 (EDA3)            | 2 |
|  | Thhalv10026318m | AT4G14690 | null   | EARLY LIGHT-INDUCIBLE PROTEIN 2 (ELIP2)           | 2 |
|  | Thhalv10000997m | AT5G47110 | null   | LIGHT-HARVESTING-LIKE 3:2 (LIL3:2)                | 2 |
|  | Thhalv10001663m | AT2G46820 | null   | PHOTOSYSTEM I P SUBUNIT (PSI-P)                   | 2 |
|  | Thhalv10025278m | AT4G37920 | null   | CHLOROPLAST DEVELOPMENT AND BIOGENESIS1 (CDB1)    | 2 |
|  | Thhalv10028649m | AT4G01050 | null   | THYLAKOID RHODANESE-LIKE (TROL)                   | 2 |
|  | Thhalv10023702m | AT1G54500 | null   | RBD1                                              | 2 |
|  | Thhalv10026511m | AT4G31560 | null   | HIGH CHLOROPHYLL FLUORESCENCE 153 (HCF153)        | 2 |
|  | Thhalv10015015m | AT5G51545 | null   | LOW PSII ACCUMULATION2 (LPA2)                     | 2 |
|  | Thhalv10015672m | AT3G46610 | null   | LOW PHOTOSYNTHETIC EFFICIENCY 1 (LPE1)            | 2 |
|  | Thhalv10020271m | AT3G17040 | null   | HIGH CHLOROPHYLL FLUORESCENT 107 (HCF107)         | 2 |
|  | Thhalv10008318m | AT1G22700 | null   | PYG7 TPR-LIKE PROTEIN                             | 2 |
|  | Thhalv10026214m | AT4G32260 | K02109 | PIGMENT DEFECTIVE 334 (PDE334)                    | 2 |
|  | Thhalv10028941m | AT4G03280 | K02636 | PHOTOSYNTHETIC ELECTRON TRANSFER C (PETC)         | 2 |
|  | Thhalv10029134m | AT4G04640 | K02115 | GAMMA SUBUNIT OF CHLOROPLAST ATP SYNTHASE (ATPC1) | 2 |
|  | Thhalv10028838m | AT4G09650 | K02113 | ATP SYNTHASE DELTA-SUBUNIT (ATPD)                 | 2 |
|  | Thhalv10023930m | ATCG00280 | K02705 | PHOTOSYSTEM II REACTION CENTER PROTEIN C (PSBC)   | 2 |
|  | Thhalv10011033m | ATCG00350 | K02689 | PHOTOSYSTEM I REACTION CENTER (PSAA)              | 2 |

| Classification group                | Gene ID         | Arabidopsis Homologue | KEGG Annotation (KO) <sup>1</sup> | TAIR Definition <sup>2</sup>  | Cluster |
|-------------------------------------|-----------------|-----------------------|-----------------------------------|-------------------------------|---------|
| Chloroplast structural organization | Thhalv10025758m | AT4G22240             | null                              | FIBRILLIN 1B (FBN1B)          | 2       |
|                                     | Thhalv10004837m | AT3G26070             | null                              | FIBRILLIN3A (FBN3A)           | 2       |
|                                     | Thhalv10016800m | AT2G35490             | null                              | FIBRILLIN2 (FBN2)             | 2       |
|                                     | Thhalv10028808m | AT4G04020             | null                              | FIBRILLIN 1A (FIB1A)          | 2       |
|                                     | Thhalv10021276m | AT3G23400             | null                              | FIBRILLIN4 (FBN4)             | 2       |
|                                     | Thhalv10011532m | AT1G51110             | null                              | FIBRILLIN10 (FBN10)           | 2       |
|                                     | Thhalv10021454m | AT3G07430             | null                              | YGGT FAMILY PROTEIN (YLMG1-1) | 1       |

|                 |           |      |                                                     |   |
|-----------------|-----------|------|-----------------------------------------------------|---|
| Thhalv10019896m | AT3G18110 | null | ALBINO COTYLEDON MUTANT1 (ACM1)                     | 1 |
| Thhalv10005036m | AT1G42960 | null | CARBOXYLTRANSFERASE INTERACTOR1 (CTI1)              | 2 |
| Thhalv10020179m | AT3G07700 | null | SALT-INDUCED ABC1 KINASE 7 (ABC1K7)                 | 2 |
| Thhalv10027870m | AT5G38660 | null | ACCLIMATION OF PHOTOSYNTHESIS TO ENVIRONMENT (APE1) | 2 |
| Thhalv10014904m | AT5G08050 | null | RIQ1                                                | 2 |
| Thhalv10019168m | AT1G74730 | null | RIQ2                                                | 2 |
| Thhalv10029019m | AT4G01150 | null | CURVATURE THYLAKOID 1A (CURT1A)                     | 2 |
| Thhalv10026263m | AT4G13200 | null | PASTOGLOBULAR PROTEIN 18 (PG18)                     | 2 |
| Thhalv10020153m | AT3G16000 | null | MAR BINDING FILAMENT-LIKE PROTEIN 1 (MFP1)          | 2 |
| Thhalv10006729m | AT1G03160 | null | FZO-LIKE (FZL)                                      | 2 |

| Classification group                         | Gene ID         | Arabidopsis Homologue | KEGG Annotation (KO) <sup>1</sup> | TAIR Definition <sup>2</sup>                                                 | Cluster |
|----------------------------------------------|-----------------|-----------------------|-----------------------------------|------------------------------------------------------------------------------|---------|
| Translocation and transport related proteins | Thhalv10004017m | AT5G62810             | K13343                            | PEROXISOME DEFECTIVE 2 (PEX14)                                               | 2       |
|                                              | Thhalv10004795m | AT5G23040             | null                              | CHAPERONE-LIKE PROTEIN OF POR1 (CPP1)                                        | 2       |
|                                              | Thhalv10014662m | AT5G55710             | null                              | TRANSLOCON AT THE INNER ENVELOPE MEMBRANE OF CHLOROPLASTS 20-V (TIC20-V)     | 2       |
|                                              | Thhalv10014513m | AT5G52440             | null                              | HIGH CHLOROPHYLL FLUORESCENCE 106 (HCF106)                                   | 2       |
|                                              | Thhalv10000343m | AT2G24020             | null                              | SUPPRESSOR OF TIC40 2 (STIC2)                                                | 2       |
|                                              | Thhalv10013528m | AT5G16620             | null                              | TRANSLOCON AT THE INNER ENVELOPE MEMBRANE OF CHLOROPLASTS 40 (TIC40)         | 2       |
|                                              | Thhalv10020309m | AT3G18890             | null                              | TRANSLOCON AT THE INNER ENVELOPE MEMBRANE OF CHLOROPLASTS 62 (TIC62)         | 2       |
|                                              | Thhalv10018914m | AT1G72640             | null                              | NAD(P)-BINDING ROSSMANN-FOLD SUPERFAMILY PROTEIN                             | 2       |
|                                              | Thhalv10025732m | AT4G23430             | null                              | TRANSLOCON AT THE INNER ENVELOPE MEMBRANE OF CHLOROPLASTS 32-IVA (TIC32-IVA) | 2       |
|                                              | Thhalv10013251m | AT5G01590             | null                              | TRANSLOCON AT THE INNER ENVELOPE MEMBRANE OF CHLOROPLASTS 56 (TIC56)         | 2       |

|                 |           |        |                                                                        |   |
|-----------------|-----------|--------|------------------------------------------------------------------------|---|
| Thhalv10014315m | AT5G14100 | null   | ARABIDOPSIS THALIANANON-INTRINSIC ABC PROTEIN 14 (ABC111)              | 2 |
| Thhalv10022775m | AT2G15290 | null   | TRANSLOCON AT INNER MEMBRANE OF CHLOROPLASTS 21 (TIC21)                | 2 |
| Thhalv10025564m | AT4G13590 | null   | CHLOROPLAST MANGANESE TRANSPORTER1 (CMT1)                              | 2 |
| Thhalv10025967m | AT4G33460 | null   | ATP-BINDING CASSETTE I10 (ATNAP13)                                     | 2 |
| Thhalv10026464m | AT4G38490 | null   | SECE2                                                                  | 2 |
| Thhalv10011270m | AT1G54350 | null   | ATP-BINDING CASSETTE D2 (ABCD2)                                        | 2 |
| Thhalv10020028m | AT3G16290 | null   | EMBRYO DEFECTIVE 2083 (EMB2083)                                        | 1 |
| Thhalv10012645m | AT5G22640 | null   | TRANSLOCON AT THE INNER ENVELOPE MEMBRANE OF CHLOROPLASTS 100 (TIC100) | 1 |
| Thhalv10022631m | AT2G18710 | K10956 | SECY HOMOLOG 1 (SCY1)                                                  | 2 |
| Thhalv10024543m | AT4G24280 | K03283 | HEAT SHOCK PROTEIN 70-6 (HSP70-6)                                      | 2 |
| Thhalv10024544m | AT4G24280 | K03283 | HEAT SHOCK PROTEIN 70-6 (HSP70-6)                                      | 1 |
| Thhalv10008025m | AT1G06870 | K03100 | PLASTIDIC TYPE I SIGNAL PEPTIDASE 2A (PLSP2A)                          | 1 |
| Thhalv10007427m | AT1G24490 | K03217 | ALBINA 4 (ALB4)                                                        | 1 |
| Thhalv10000946m | AT2G01110 | K03118 | TWIN-ARGININE TRANSLOCATION C (TATC)                                   | 2 |
| Thhalv10001508m | AT2G45770 | K03110 | ALPHA SUBUNIT CHLOROPLAST SRP RECEPTOR HOMOLOG (CPFTSY)                | 2 |
| Thhalv10005085m | AT5G28750 | K03116 | TWIN-ARGININE TRANSLOCATION A (TATA)                                   | 2 |

<sup>1</sup> <https://www.genome.jp/kegg/>

<sup>2</sup> <https://www.arabidopsis.org/>

**Supplementary Table 2. Primers used for genotyping and qRT-PCR**

|                   | <b>Primers</b>     | <b>Sequence</b>                     |
|-------------------|--------------------|-------------------------------------|
| <b>Genotyping</b> | P35S-Fw            | 5'-CGC ACA ATC CCA CTA TCC TT-3'    |
|                   | Ins-EsPTOX-Rv      | 5'-GCG TCG AAG AGC AAT CAA AG-3'    |
|                   | lhcb5-Fw           | 5'-CGC CAC TAG TGA TAA AAT CGC-3'   |
|                   | lhcb5-Rv           | 5'-TAA ACG GTG AAG TTG CTG GAG-3'   |
|                   | T-DNA-Fw (LBb1.3)  | 5'-ATT TTG CCG ATT TCG GAA C-3'     |
| <b>qRT-PCR</b>    | q-EsPTOX-234F      | 5'-GCC GCC GTT TCG TAC AGT A-3'     |
|                   | q-EsPTOX-302R      | 5'-GAG CAG GCG AGG AGA AGA GA-3'    |
|                   | Thhalv10022631m-Fw | 5'-TCGATCCCTCTAGTCCGACC-3'          |
|                   | Thhalv10022631m-Rv | 5'-AGAACGGCCAGAAATGCAGA-3'          |
|                   | Thhalv10026385m-Fw | 5'-ACCACCGATGAACACAACCT-3'          |
|                   | Thhalv10026385m-Rv | 5'-GATCTCACTGGAGGCCAACC-3'          |
|                   | Em-GADPH-Fw        | 5'-AAG TTC TCG CTC AAC GCA AT-3'    |
|                   | Em-GADPH-Rv        | 5'-TTG GTG ACA GCA GGT CGA G-3'     |
|                   | At-GADPH-Fw        | 5'-AAA CTT GTC GCT CAA TGC AAT C-3' |
|                   | At-GADPH-Rv        | 5'-TTG GTG ACA ACA GGT CAA GCA-3'   |
|                   | PsbA-Em-Fw         | 5'-CGC ATA CCC AGA CGG AAA CT-3'    |
|                   | PsbA-Em-Rv         | 5'-CGC ATT CAT TGC TGC TCC TC-3'    |

## SI References

- 1- Armenteros, J. J. A., Salvatore, M., Emanuelsson, O., Winther, O., Von Heijne, G., Elofsson, A., & Nielsen, H. (2019). Detecting sequence signals in targeting peptides using deep learning. *Life science alliance*, 2(5).
- 2- Petsalaki, E. I., Bagos, P. G., Litou, Z. I., & Hamodrakas, S. J. (2006). PredSL: a tool for the N-terminal sequence-based prediction of protein subcellular localization. *Genomics, Proteomics & Bioinformatics*, 4(1), 48-55.
- 3- Mori, H., & Cline, K. (2001). Post-translational protein translocation into thylakoids by the Sec and  $\Delta$ pH-dependent pathways. *Biochimica et Biophysica Acta (BBA)-Molecular Cell Research*, 1541(1-2), 80-90.
- 4- Dittmar, J., Schlesier, R., & Klösgen, R. B. (2014). Tat transport of a Sec passenger leads to both completely translocated as well as membrane-arrested passenger proteins. *Biochimica et Biophysica Acta (BBA)-Molecular Cell Research*, 1843(2), 446-453.
